# Supplementary material for: Incremental effects of antihypertensive drugs: instrumental variable analysis
Source: PubMed Central journal article supplement — BMJ. 2017 Dec 22;359:j5542. doi: 10.1136/bmj.j5542 (PMC5736968; doi:10.1136/bmj.j5542), 2017-12-22
Supplement: mara038957.ww4.pdf [file mara038957.ww4.pdf]

Appendix 4: Supplementary figures and tables [posted as supplied by author]

Figure A. CONSORT diagram

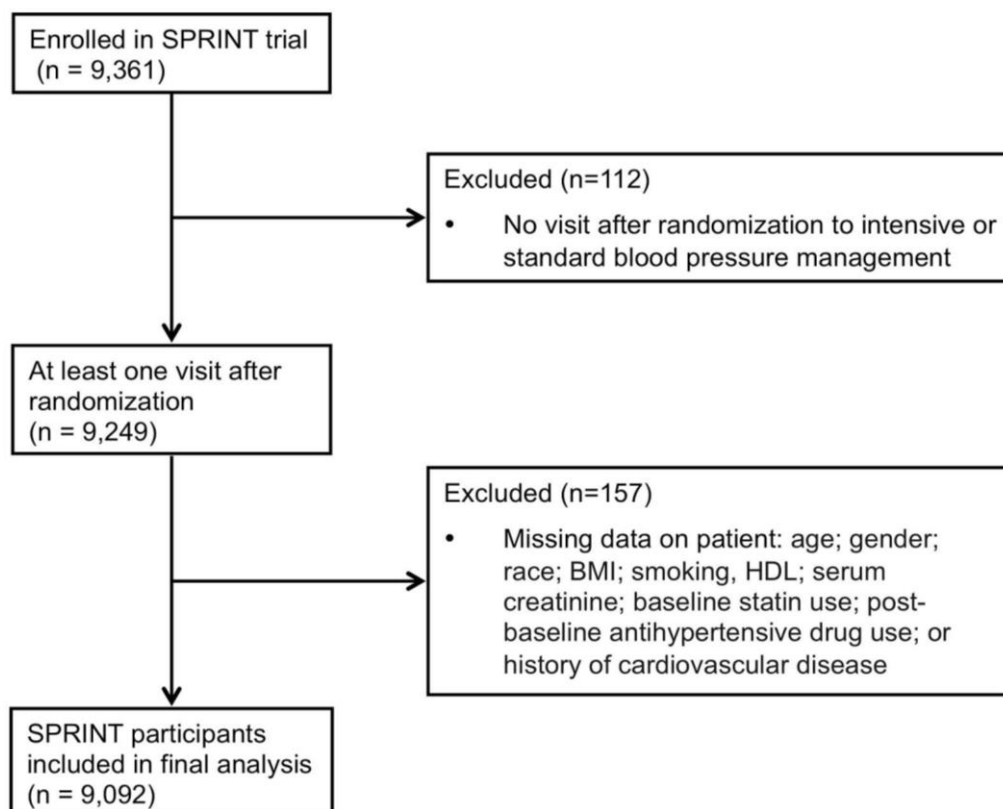

Figure B. Change in number of antihypertensive drug classes over study

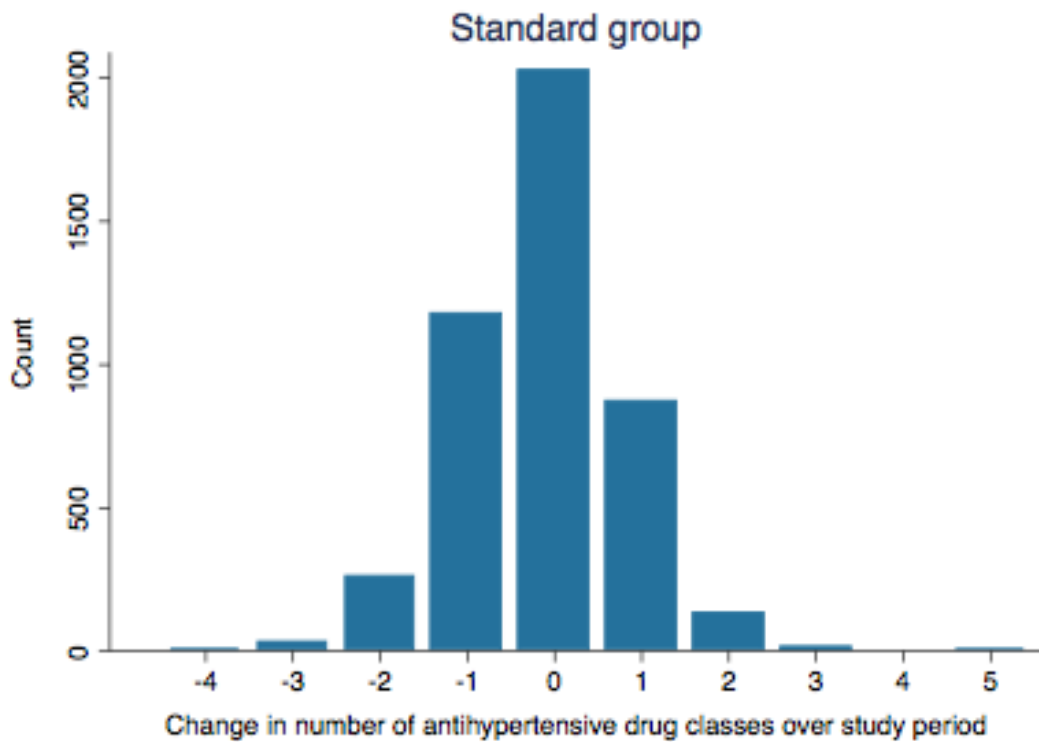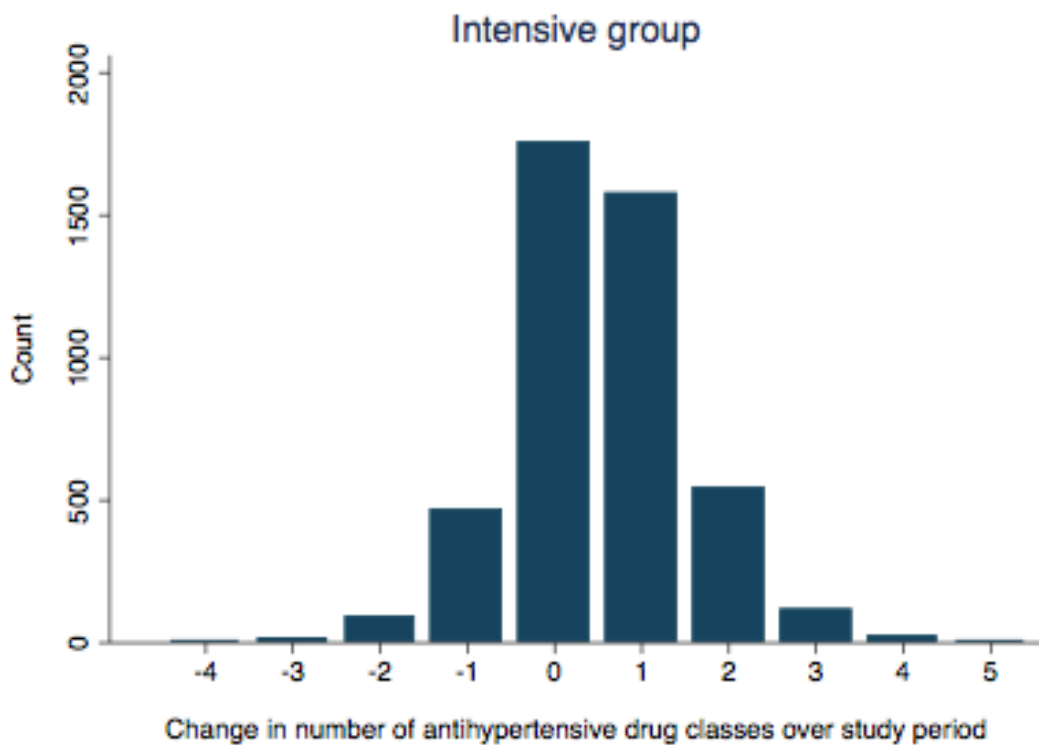

## Figure C. Incremental effects across clinical and demographic subgroups

### Figure C1. Age

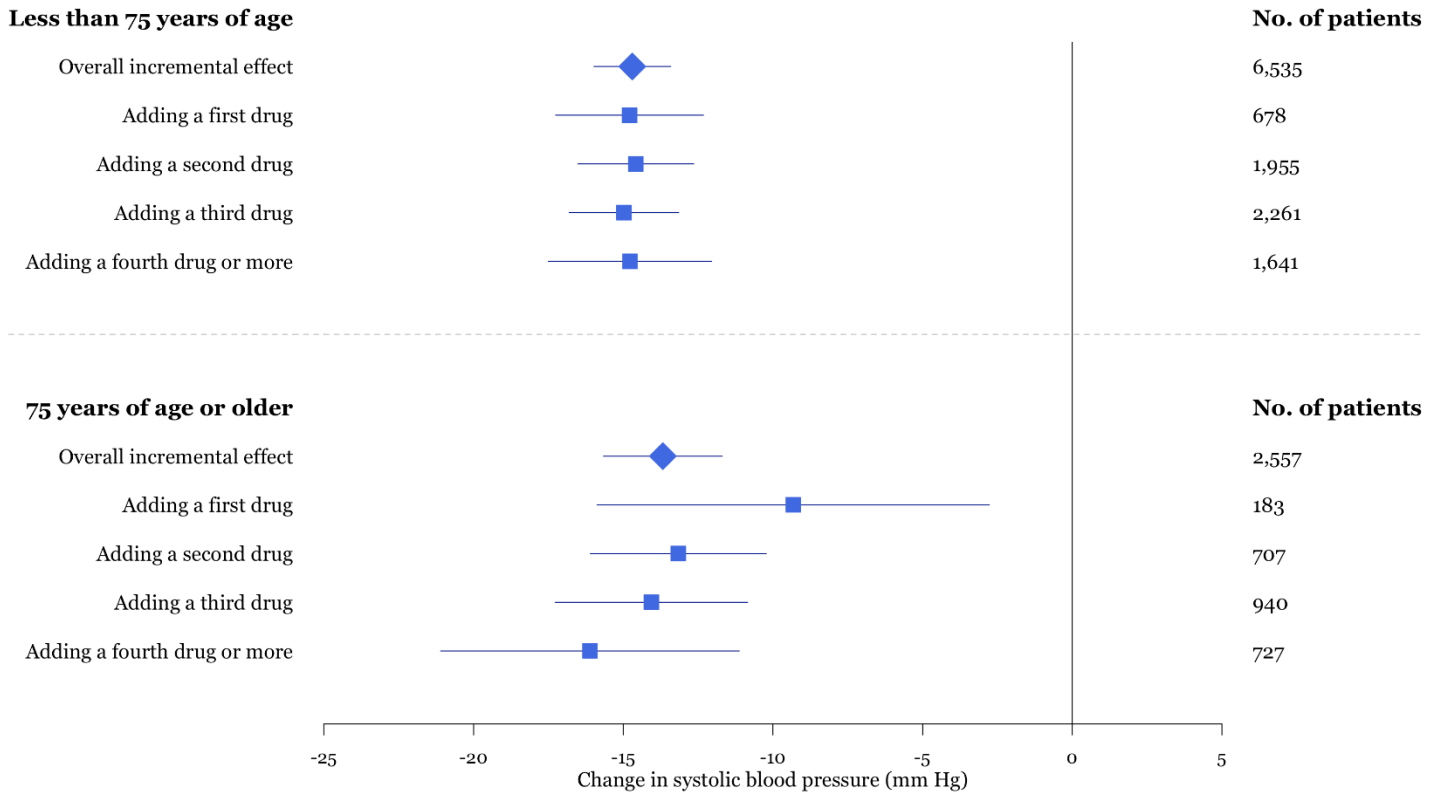

Diamonds represent point estimates from pooled models. Squares represent point estimates from models stratified by baseline number of drug classes. Lines represent 95% confidence intervals. Antihypertensive drug classes are measured at baseline and at each patient's final visit. Instrumental variable models were estimated using two-stage ordinary least squares regression.

**Figure C2. Sex**

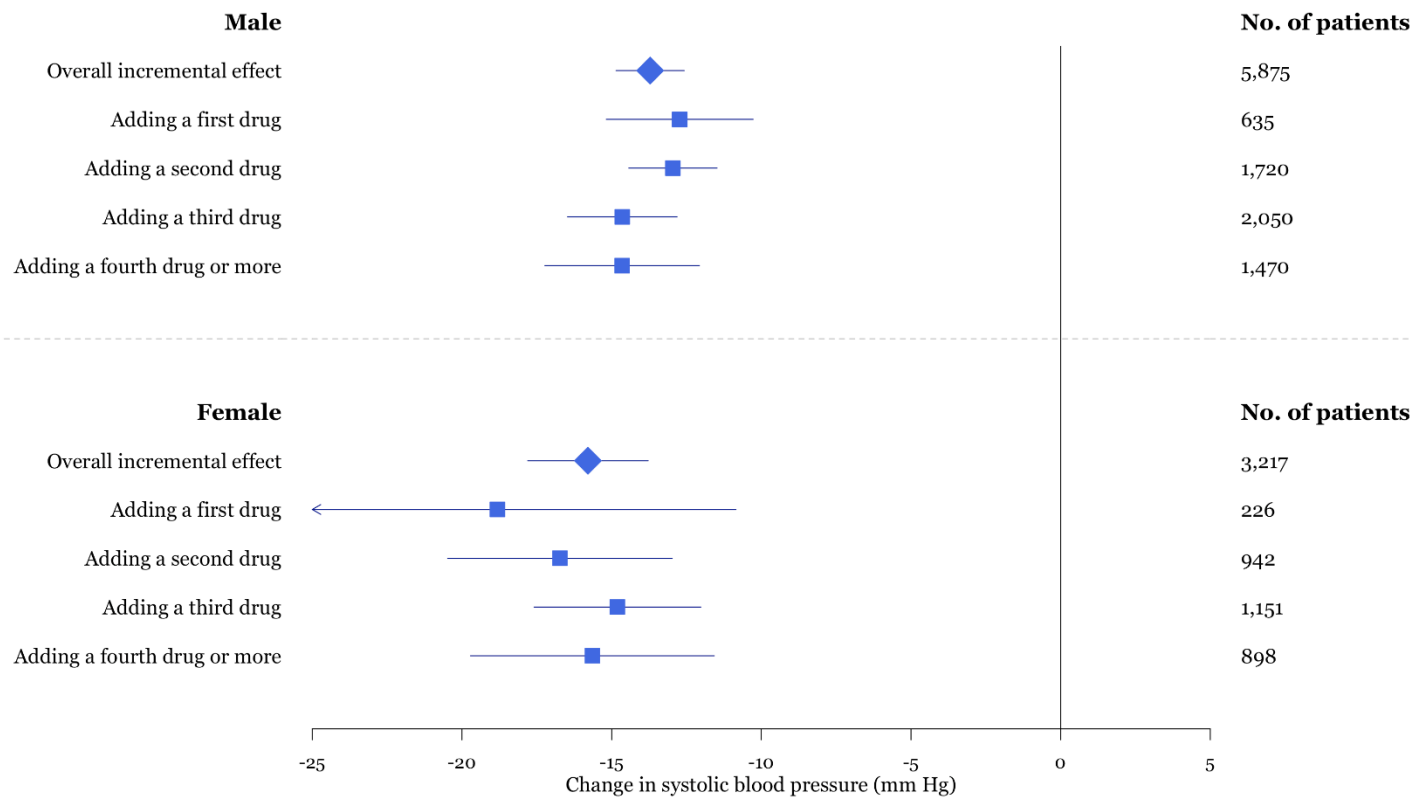

**Figure C3. Black race (race was self reported. Black includes non-Hispanic and Hispnaic black)**

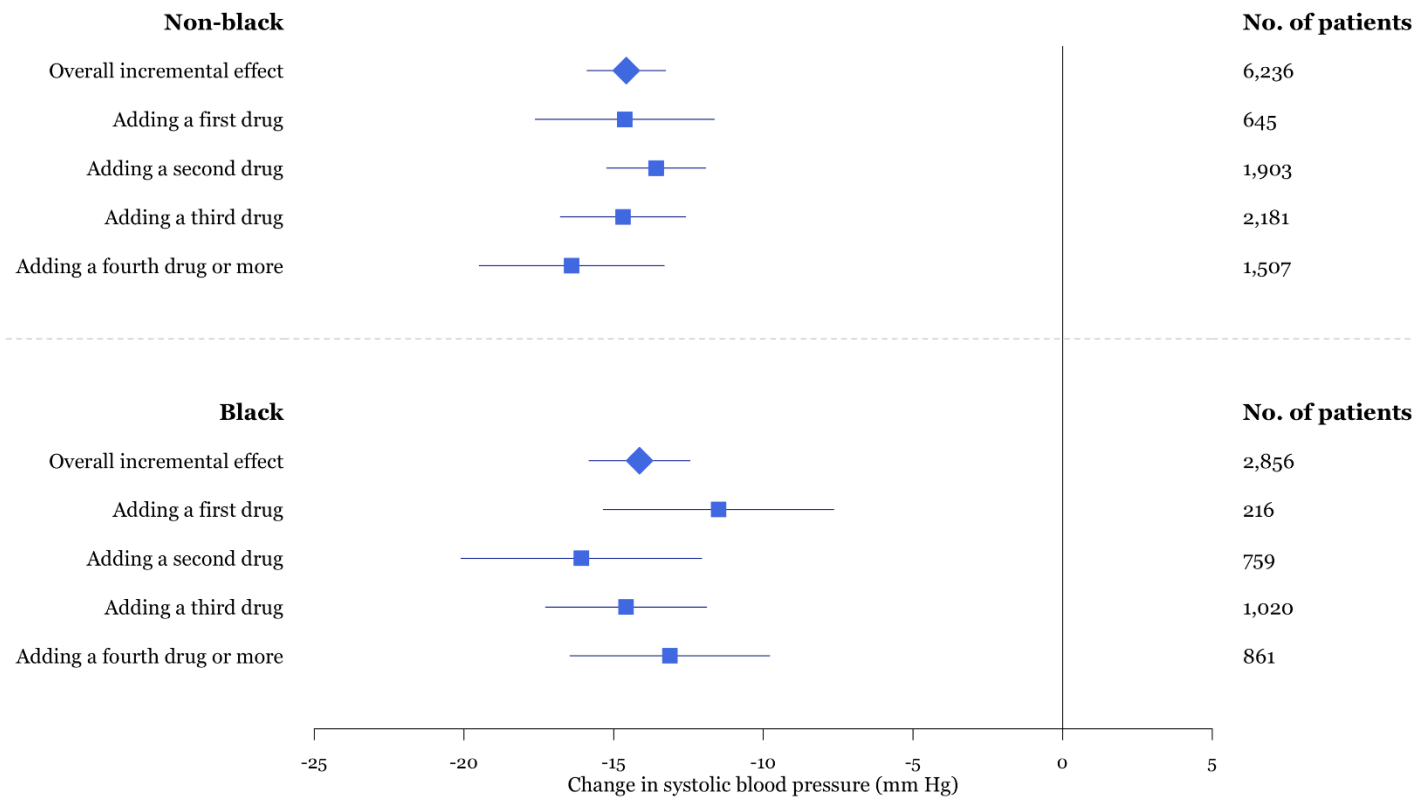

**Figure C4. Smoking status**

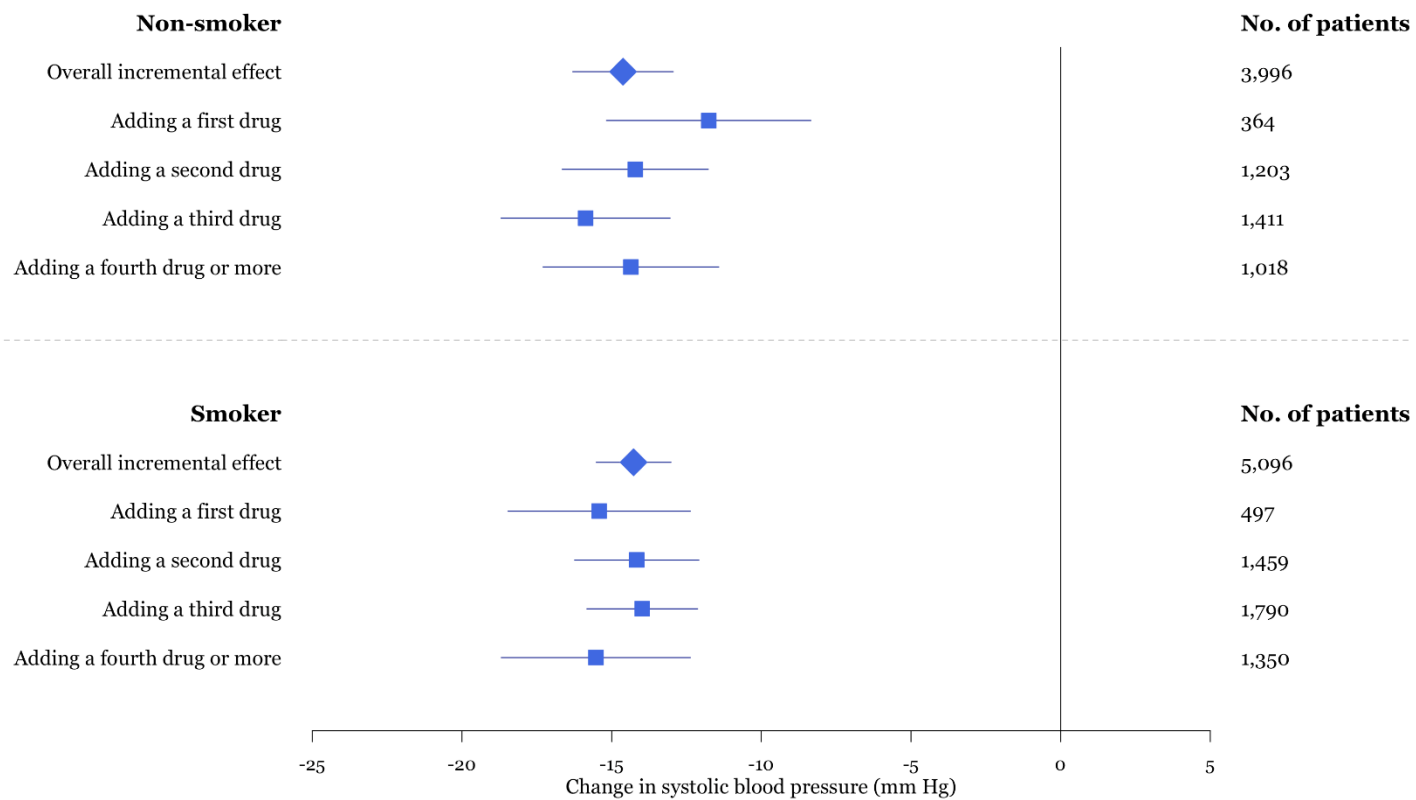

**Figure C5. Obesity (defined as BMI  $\geq 35$ )**

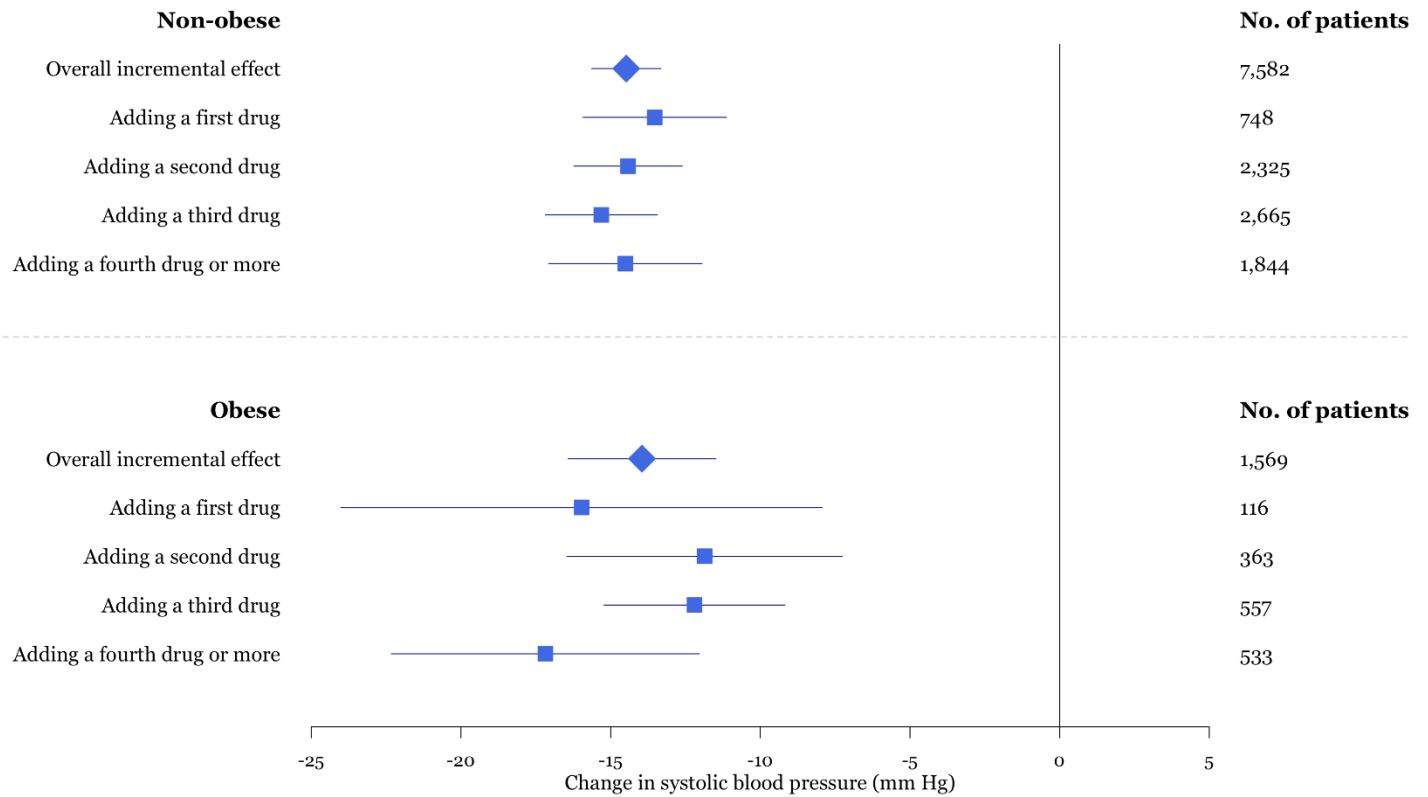

**Figure C6. History of cardiovascular disease (CVD)**

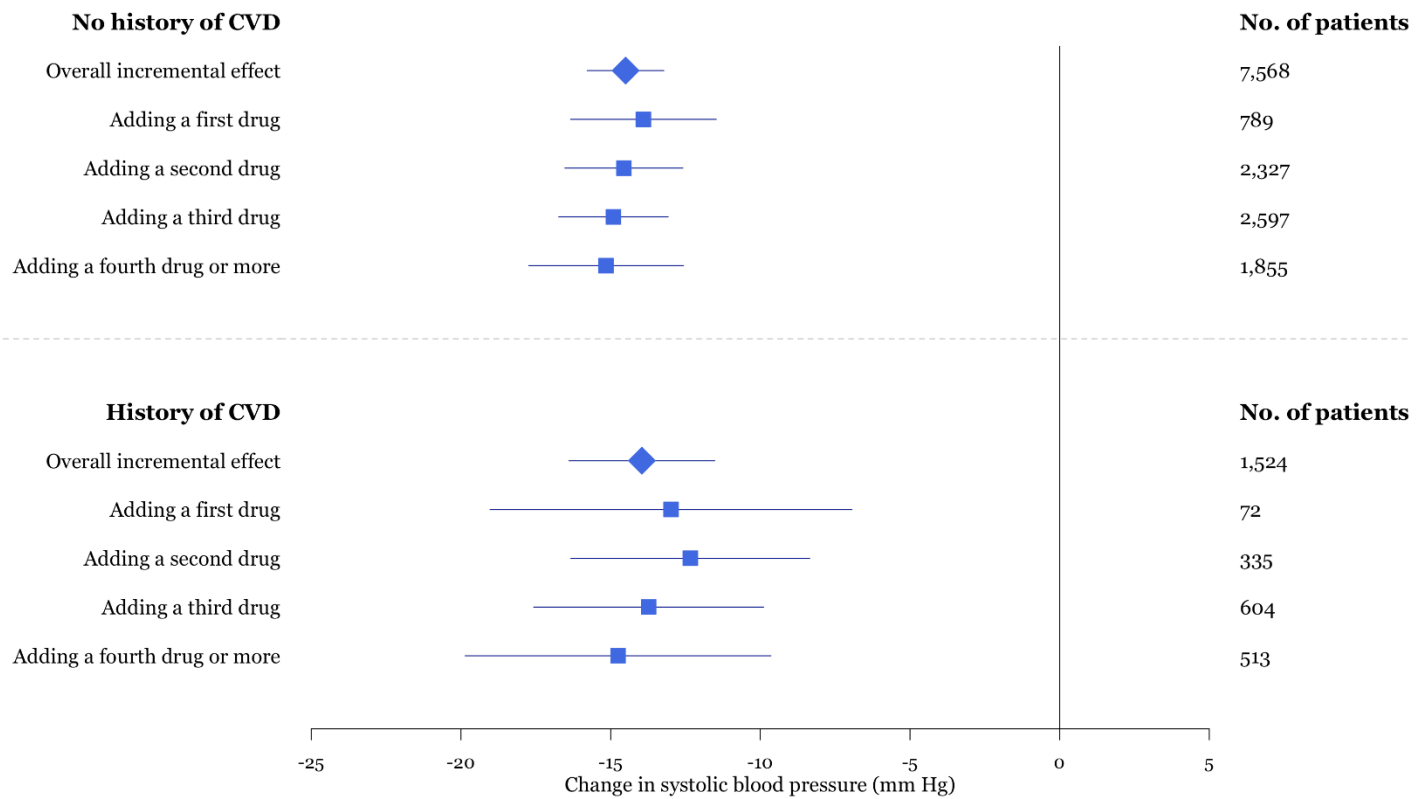



**Figure C7. History of chronic kidney disease (CKD). Category “no history of CKD includes some participants with unknown CKD status at baseline)**

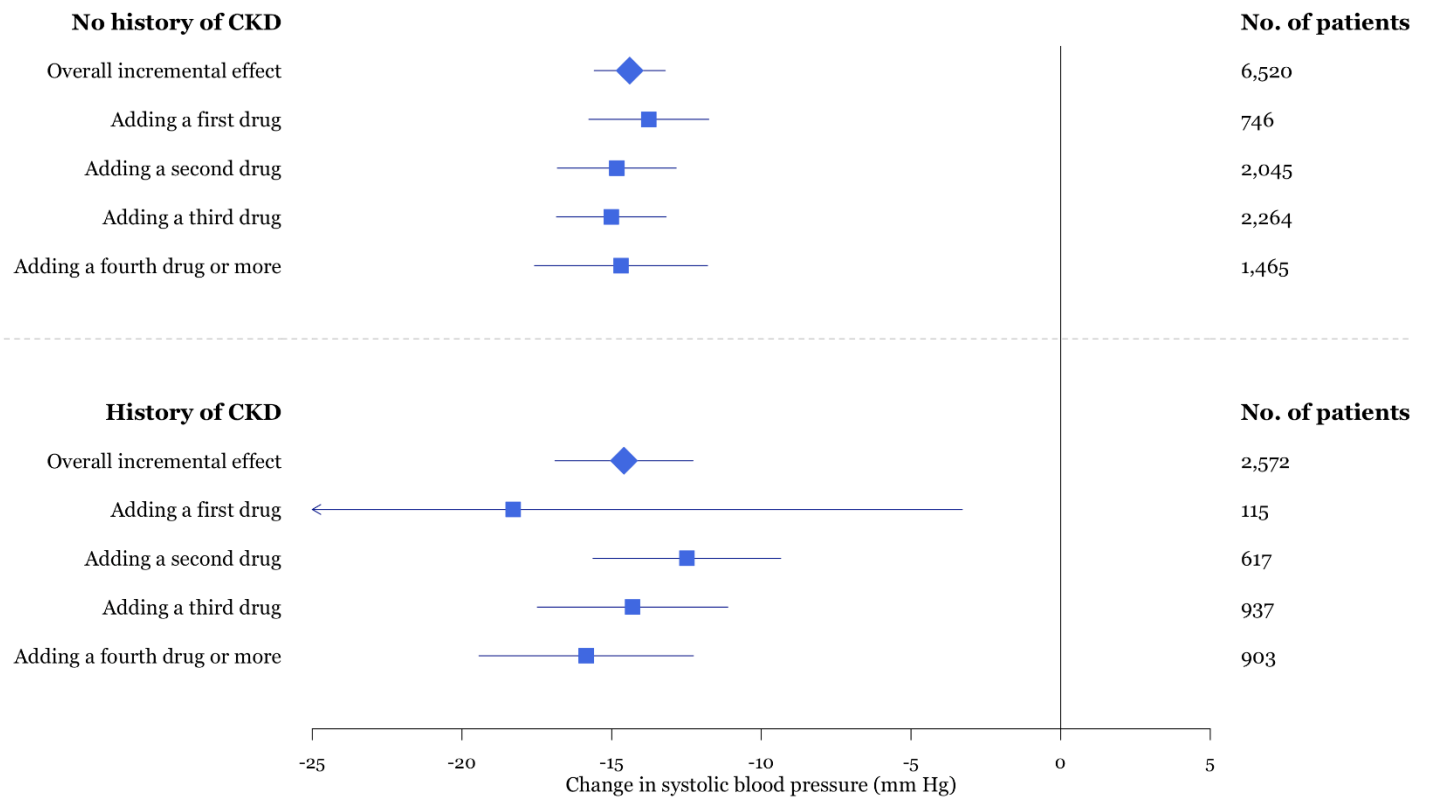

**Figure D. Incremental effect of antihypertensive drugs on systolic blood pressure at the three-month visit**

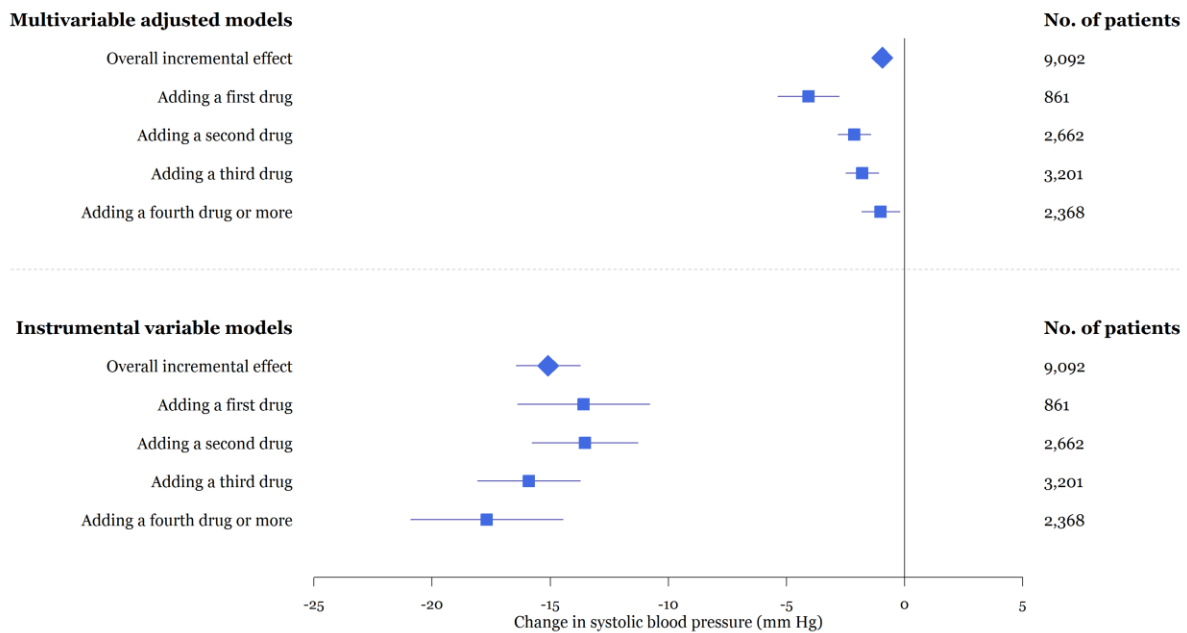

Diamonds represent point estimates from pooled models. Squares represent point estimates from models stratified by baseline number of drug classes. Lines represent 95% confidence intervals. Systolic blood pressure is measured at the three-month visit. Antihypertensive drug classes are measured at baseline and at exit of the two-month visit. Multivariable adjusted models were estimated using ordinary least squares regression. Instrumental variable models were estimated using two-stage ordinary least squares regression.

**Figure E. Incremental effect of mean number of antihypertensive drugs on systolic blood pressure**

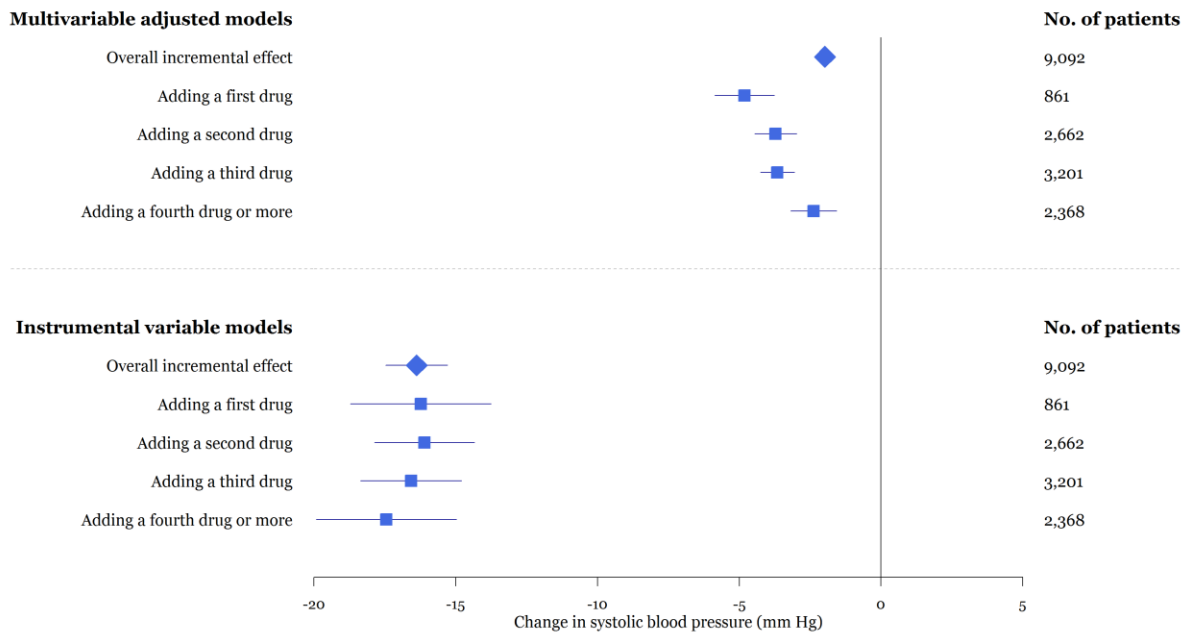

Diamonds represent point estimates from pooled models. Squares represent point estimates from models stratified by baseline number of drug classes. Lines represent 95% confidence intervals. Systolic blood pressure is measured at the final visit. We calculated the mean number of antihypertensive drug classes a patient was recorded as being prescribed over the study period. Multivariable adjusted models were estimated using ordinary least squares regression. Instrumental variable models were estimated using two-stage ordinary least squares regression.

**Figure F. Cumulative coefficient plots of the incremental effects on composite major cardiovascular events**

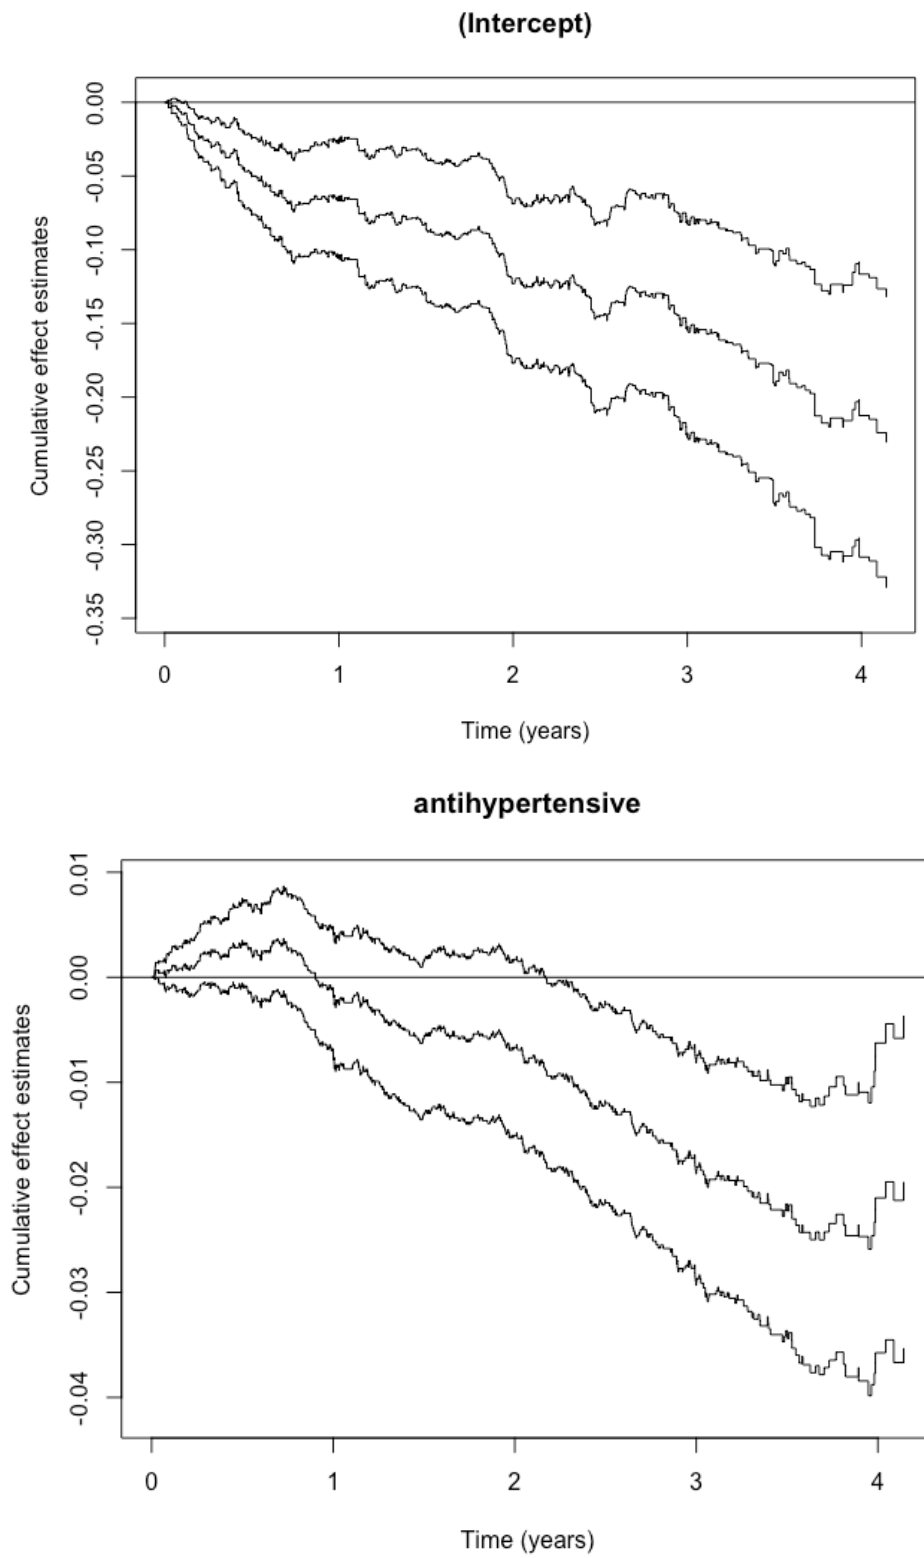

### age

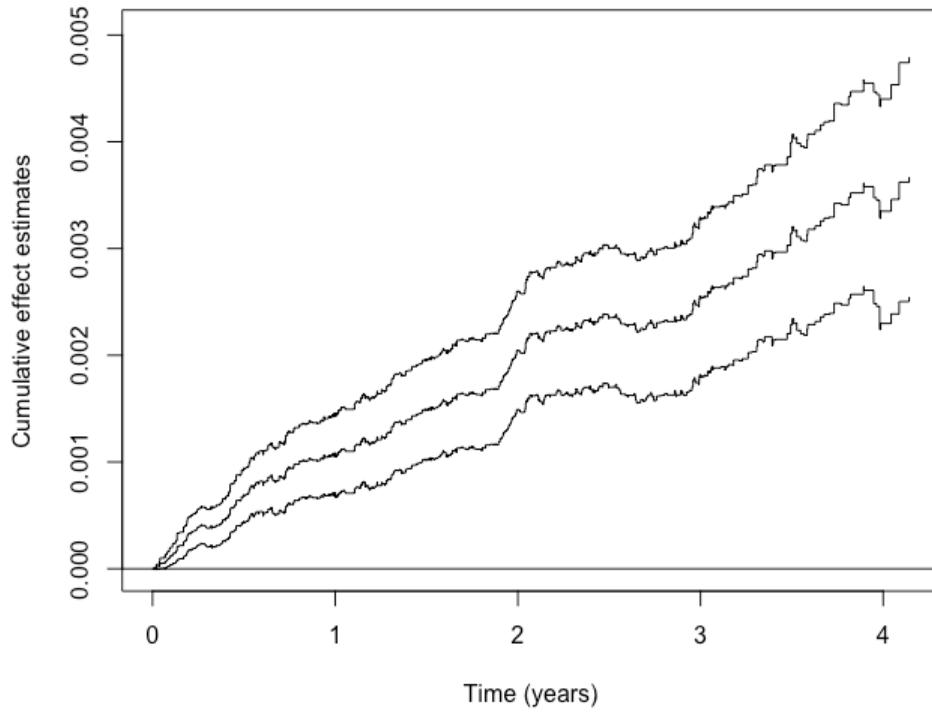

### female

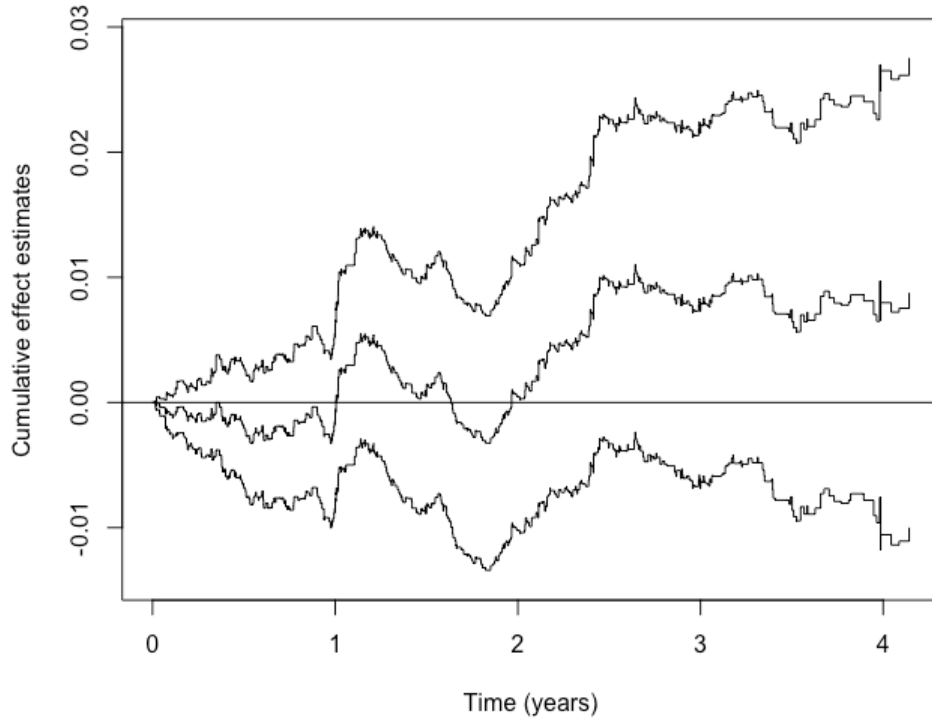

### black

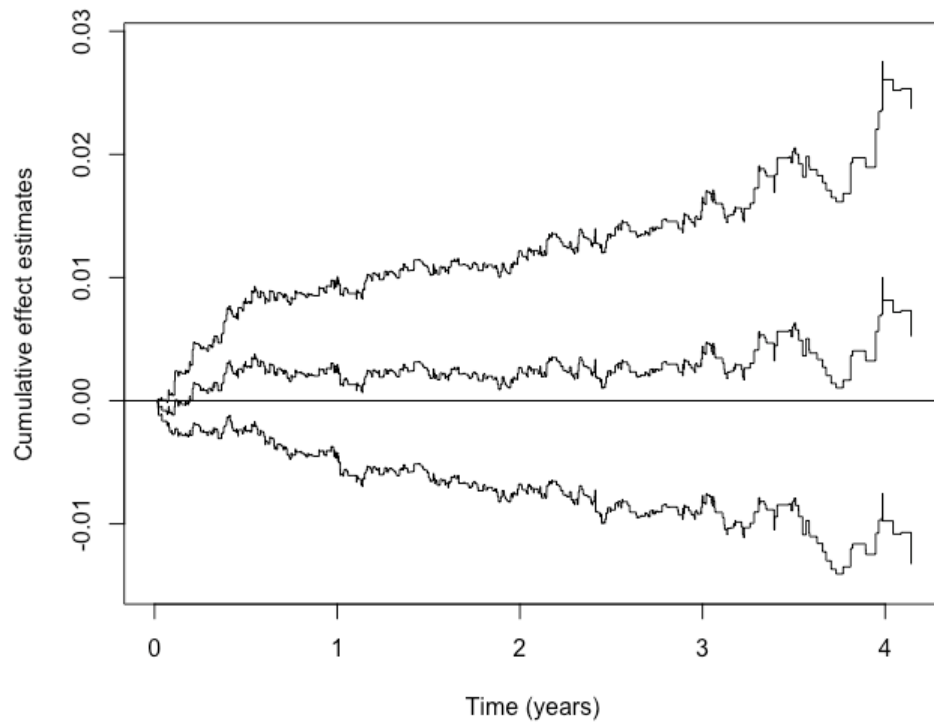

### bmi

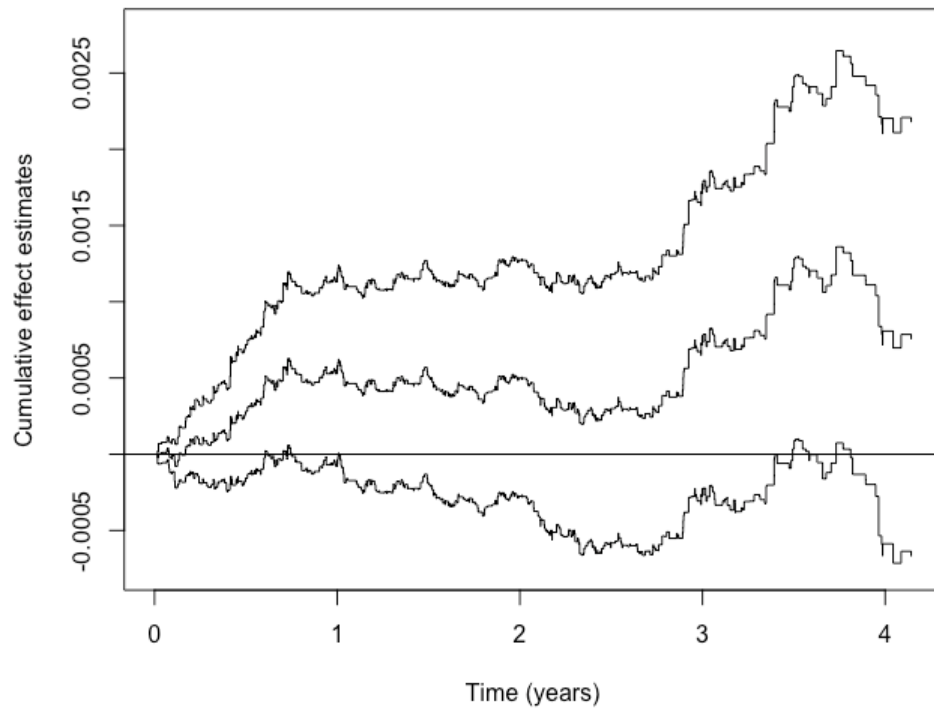

### hdl

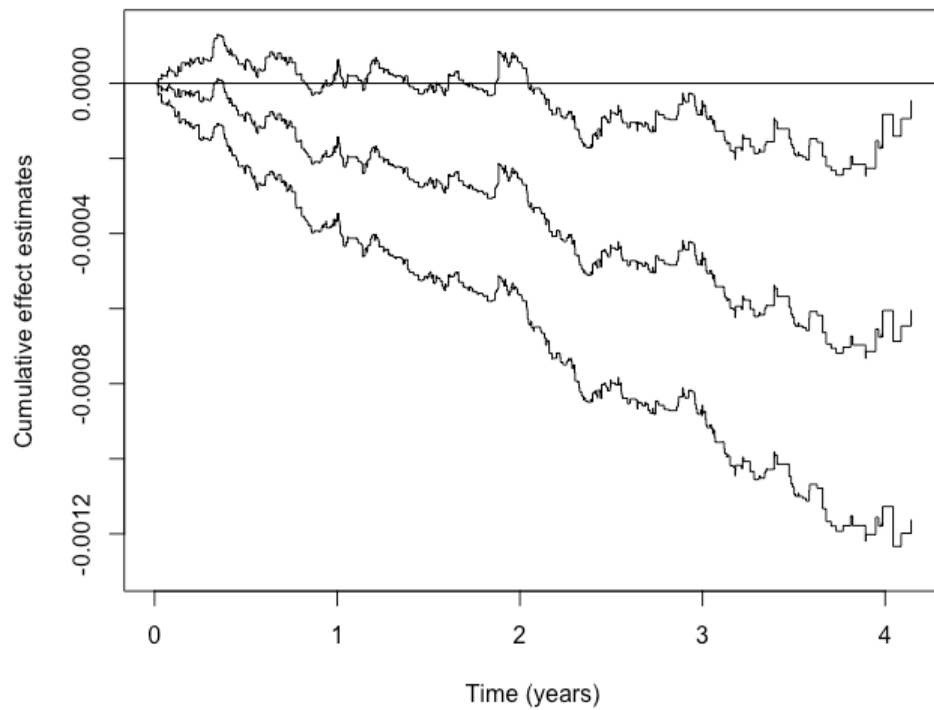

### creatinine

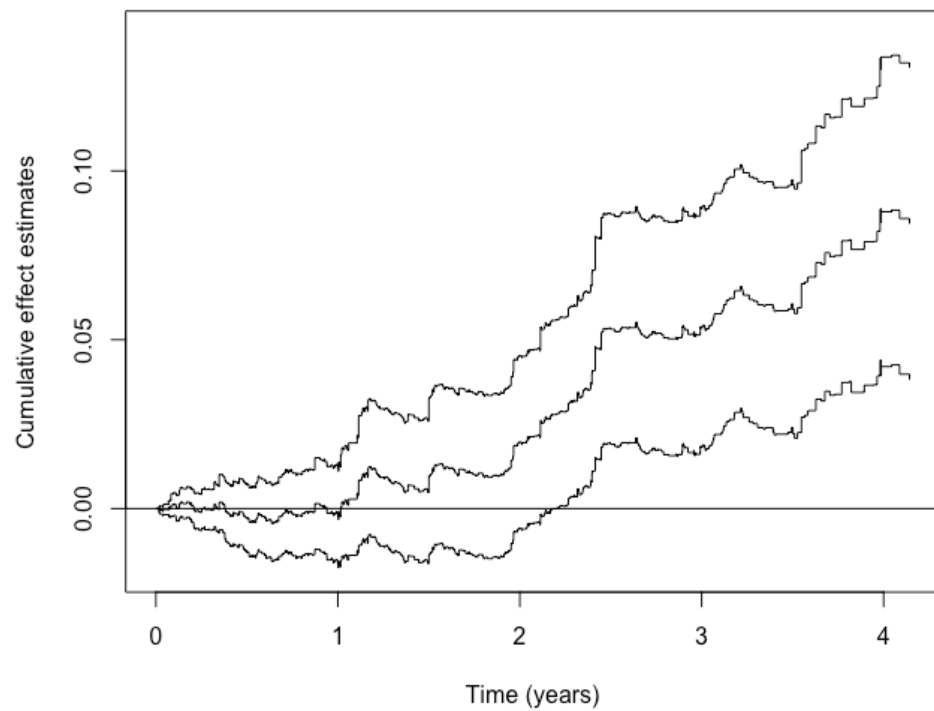

### statin

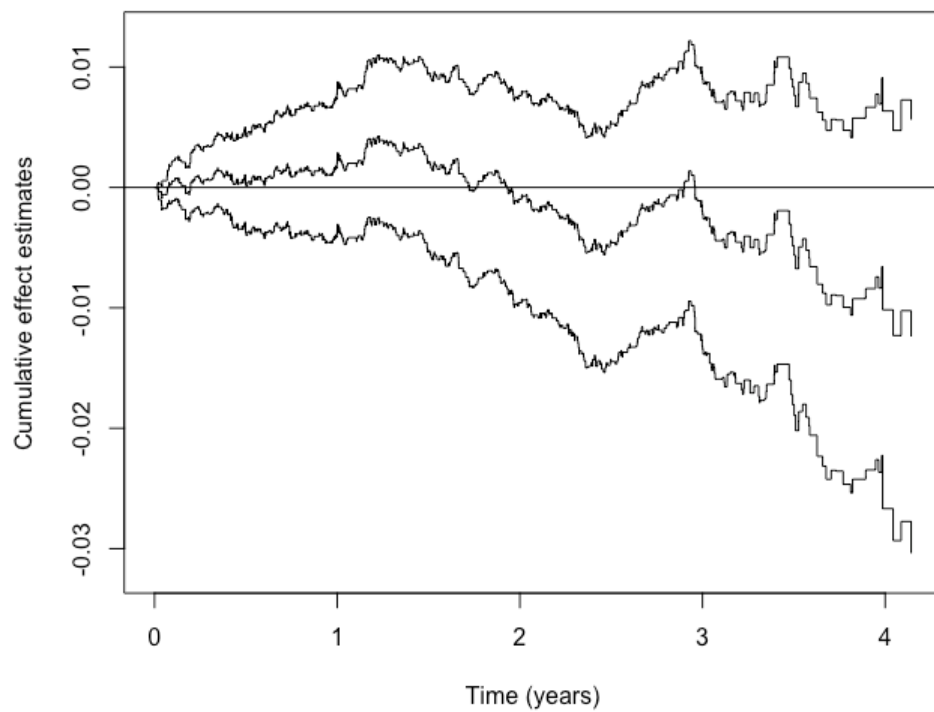

### smoker

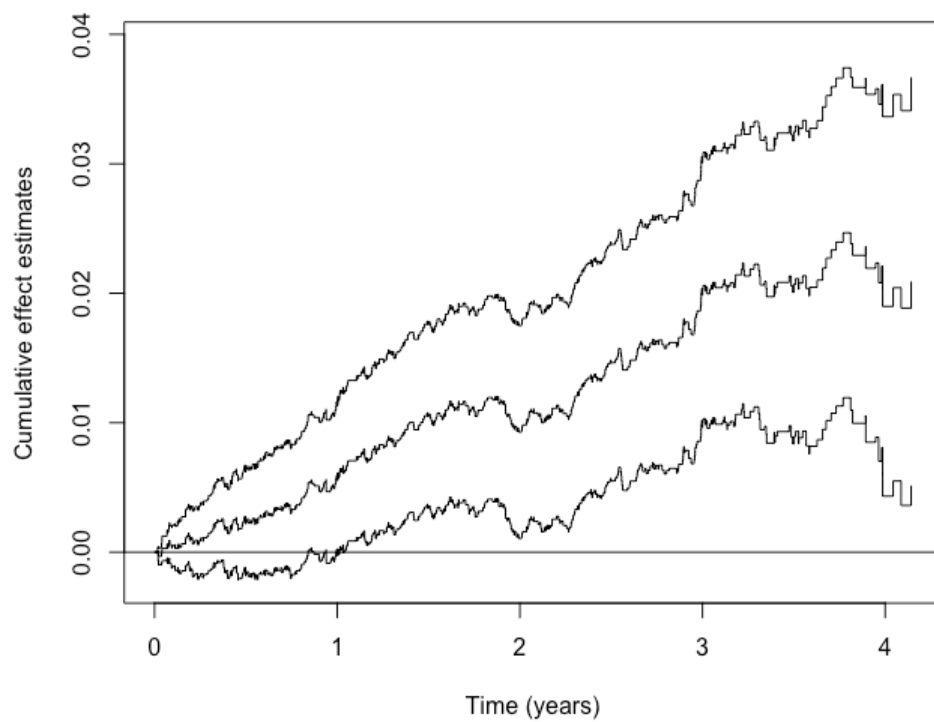



**cvd**

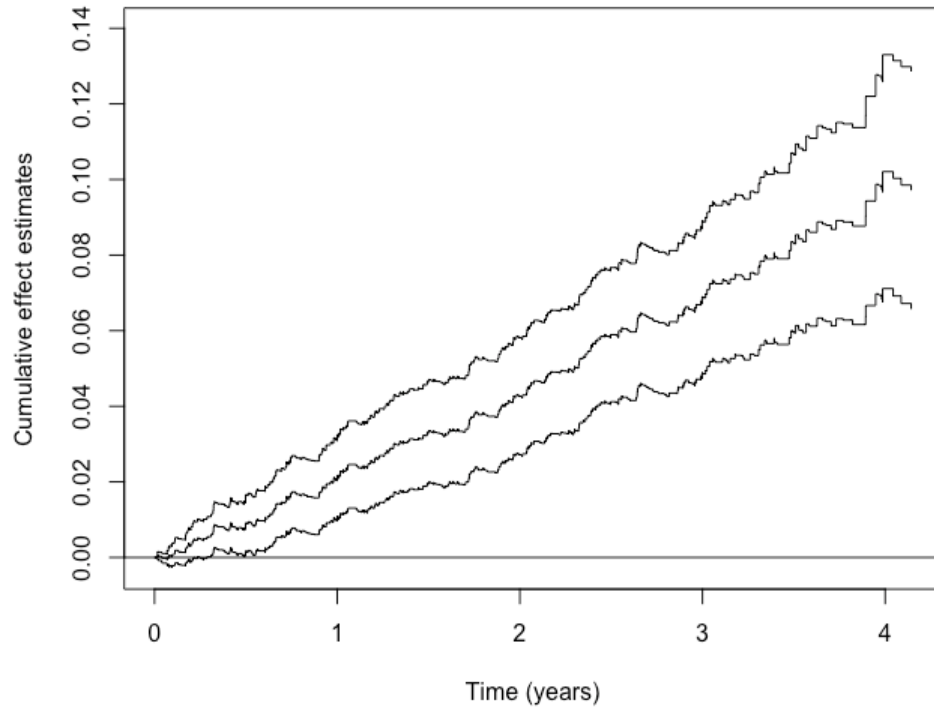

**ckd**

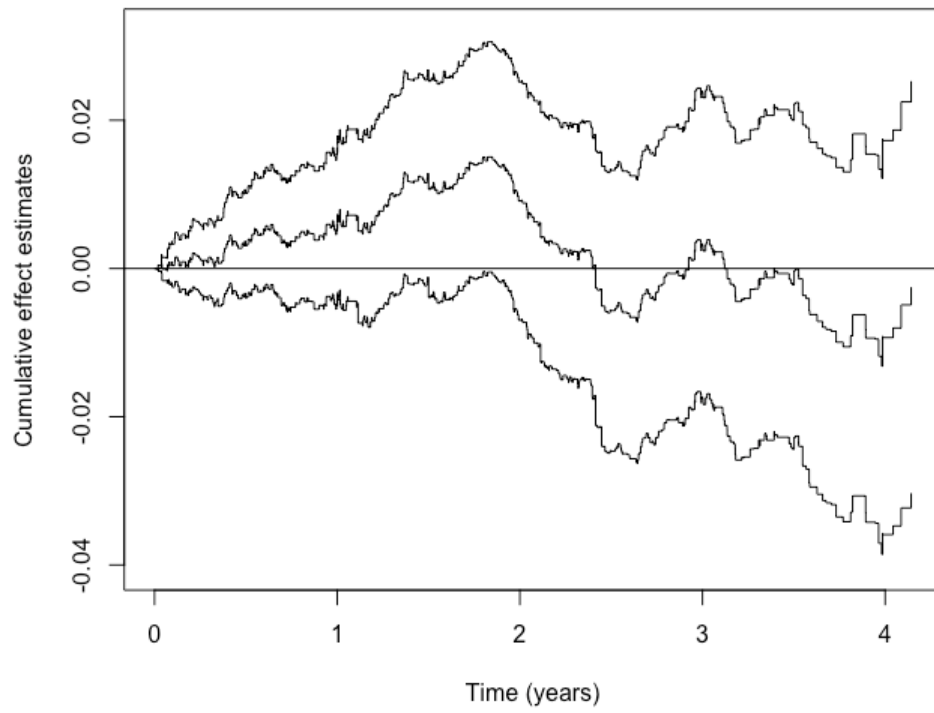

**Figure G. Incremental effect of antihypertensive drugs on diastolic blood pressure**

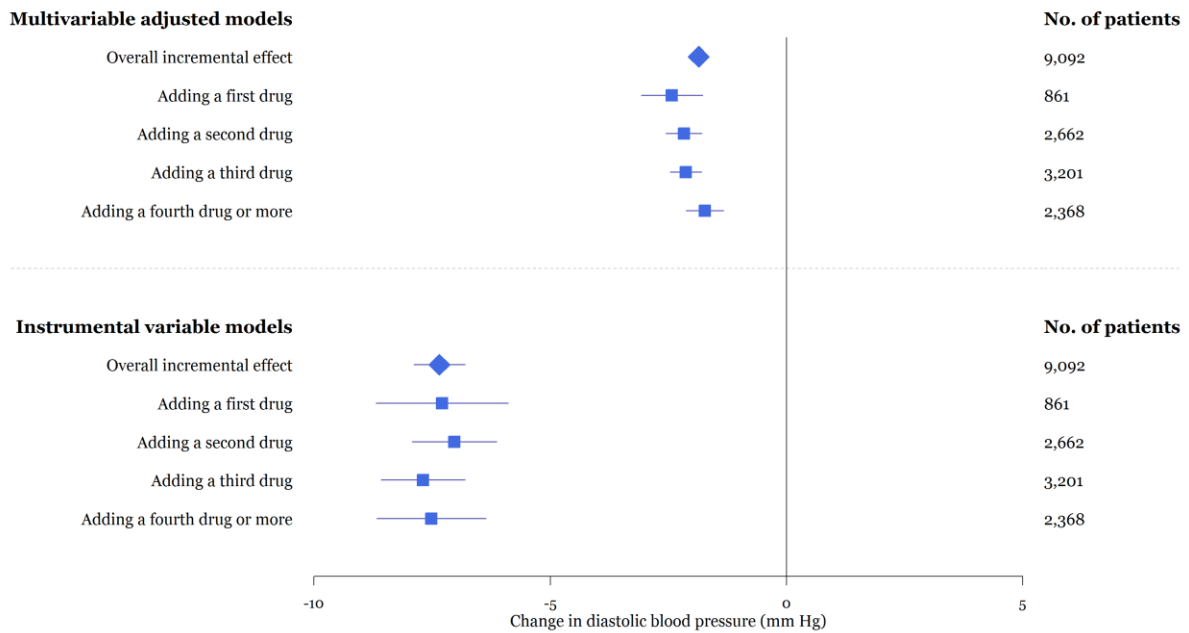

Diamonds represent point estimates from pooled models. Squares represent point estimates from models stratified by baseline number of drug classes. Lines represent 95% confidence intervals. Diastolic blood pressure represents each patient's final recorded blood pressure measurement. Antihypertensive drug classes are measured at baseline and at the latest visit at which there is also a recorded blood pressure measurement. Multivariable adjusted models were estimated using ordinary least squares regression. Instrumental variable models were estimated using two-stage ordinary least squares regression.

**Figure H. Incremental effect of antihypertensive drugs on component major cardiovascular events and all-cause mortality**

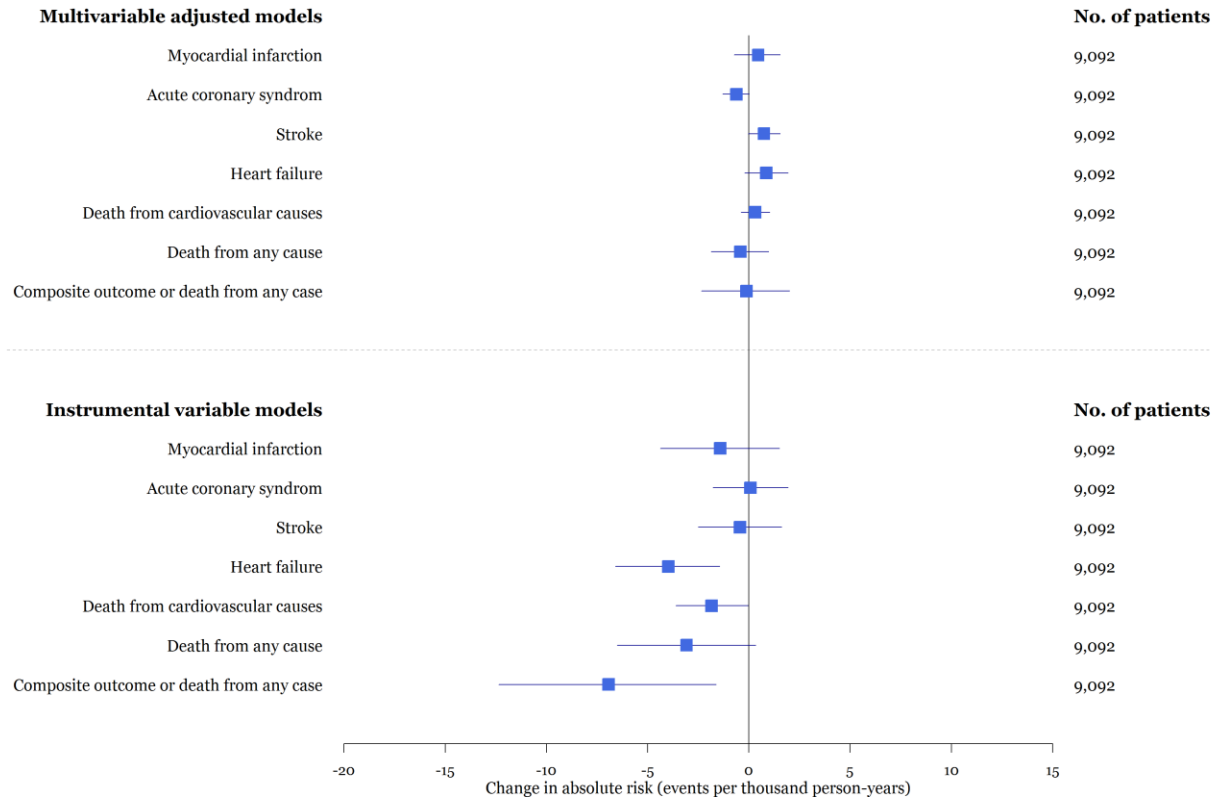

Diamonds represent point estimates from pooled models. Squares represent point estimates from models stratified by baseline number of drug classes. Lines represent 95% confidence intervals. Antihypertensive drug classes are measured at baseline and at each patient's final visit. For patients who experienced a major cardiovascular event, we used the last recorded value of drug classes before event incidence. We estimated additive hazards models to account for the right-censored nature of survival outcomes such as risk of major cardiovascular events.<sup>29</sup>

**Figure I. Incremental effect of antihypertensive drugs on component serious adverse events**

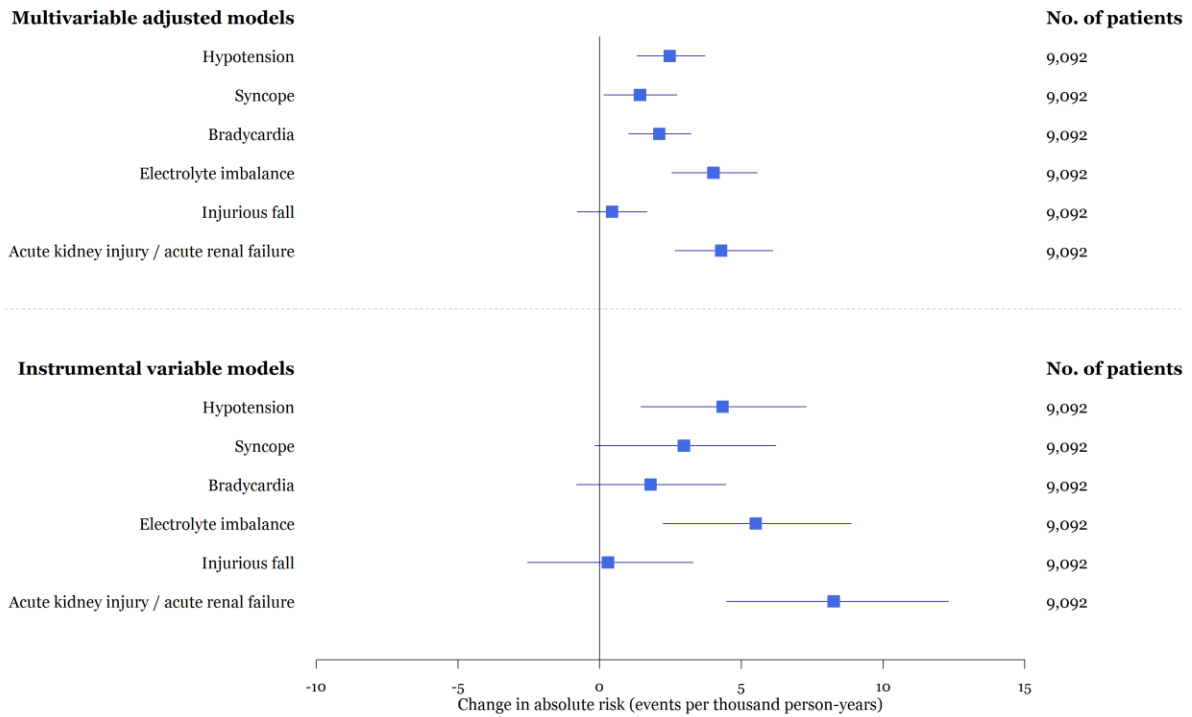

Diamonds represent point estimates from pooled models. Squares represent point estimates from models stratified by baseline number of drug classes. Lines represent 95% confidence intervals. Antihypertensive drug classes are measured at baseline and at each patient's final visit. For patients who experienced a serious adverse event, we used the last recorded value of drug classes before event incidence. We estimated additive hazards models to account for the right-censored nature of survival outcomes such as risk of serious adverse events.<sup>29</sup>

**Figure J. Incremental effect of antihypertensive drugs on systolic blood pressure in unadjusted models**

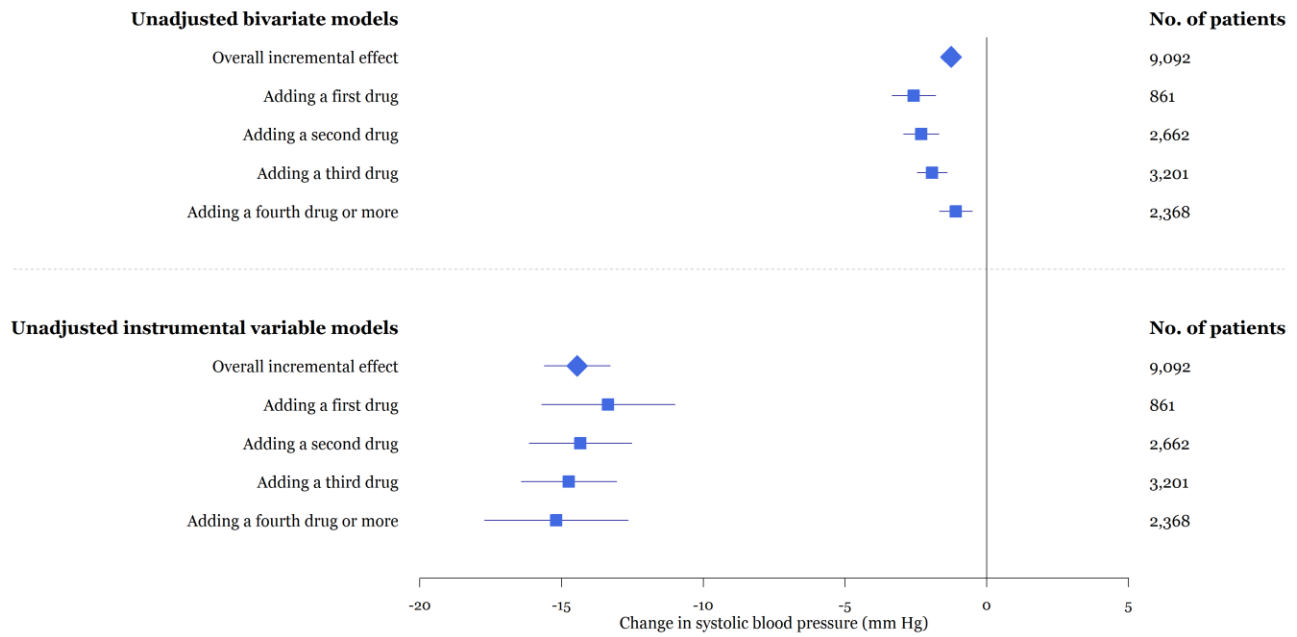

Diamonds represent point estimates from pooled models. Squares represent point estimates from models stratified by baseline number of drug classes. Lines represent 95% confidence intervals. Systolic blood pressure represents each patient's final recorded blood pressure measurement. Antihypertensive drug classes are measured at baseline and at the latest visit for which there was also a recorded blood pressure measurement. Unadjusted bivariate models were estimated using ordinary least squares and were not adjusted for any covariates. Unadjusted instrumental variable models were estimated using two-stage ordinary least squares regression and were not adjusted for any covariates.

**Figure K. Incremental effect of adding a fifth or more antihypertensive drug class on systolic blood pressure**

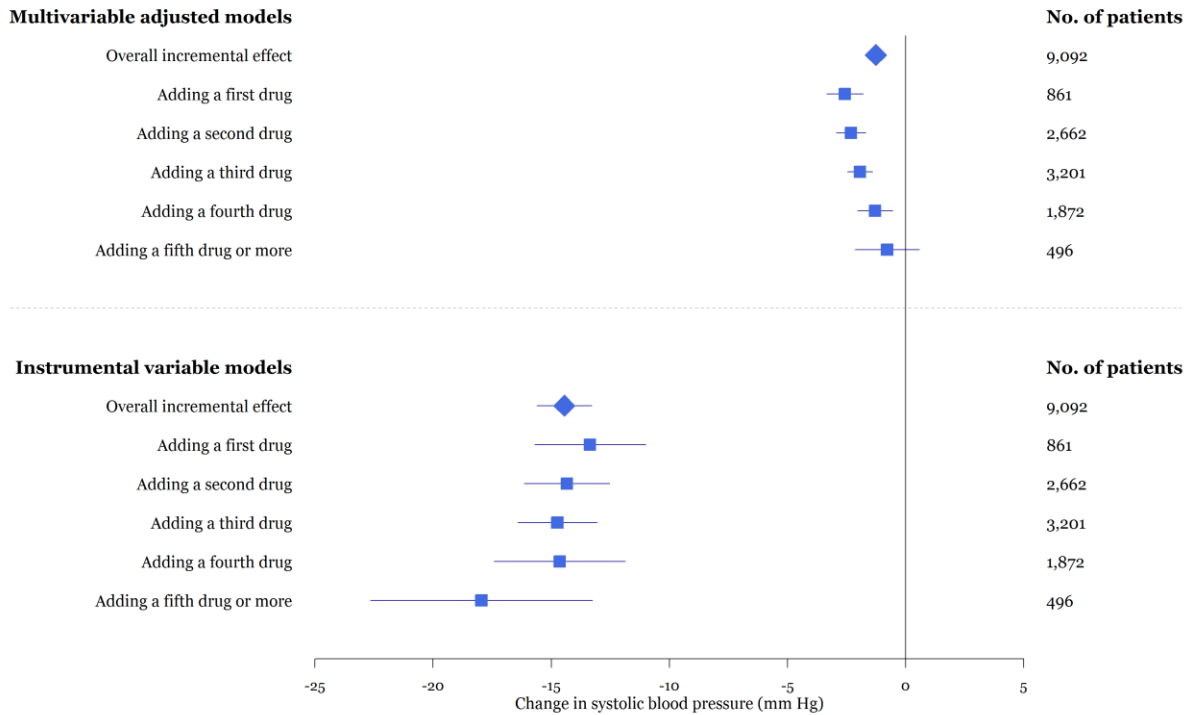

Diamonds represent point estimates from pooled models. Squares represent point estimates from models stratified by baseline number of drug classes. Lines represent 95% confidence intervals. Systolic blood pressure represents each patient's final recorded blood pressure measurement. Antihypertensive drug classes are measured at baseline and at the latest visit for which there was also a recorded blood pressure measurement. Multivariable adjusted models were estimated using ordinary least squares regression. Instrumental variable models were estimated using two-stage ordinary least squares regression.

**Table A. Distribution of number of antihypertensive drug classes at each patient’s final visit by randomization status**

| Final number of antihypertensive drug classes <sup>a</sup> | Standard (N= 4523) | Intensive (N= 4569) |
|------------------------------------------------------------|--------------------|---------------------|
| 0                                                          | 486 (10.7%)        | 80 (1.8%)           |
| 1                                                          | 1432 (31.7%)       | 464 (10.2%)         |
| 2                                                          | 1505 (33.3%)       | 1383 (30.3%)        |
| 3                                                          | 796 (17.6%)        | 1499 (32.8%)        |
| 4                                                          | 250 (5.5%)         | 855 (18.7%)         |
| 5                                                          | 50 (1.1%)          | 242 (5.3%)          |
| 6                                                          | 3 (0.1%)           | 39 (0.9%)           |
| 7                                                          | 1 (<1%)            | 7 (0.2%)            |

<sup>a</sup>Final number of antihypertensive drug classes were measured at the latest visit for which there was also a recorded blood pressure measurement.

**Table B. Change in number of antihypertensive drug classes over study period by number of drug classes at baseline**

| Number of antihypertensive drug classes at baseline | Change in number of drug classes over study period <sup>a</sup> |    |     |     |     |     |     |    |    |    |
|-----------------------------------------------------|-----------------------------------------------------------------|----|-----|-----|-----|-----|-----|----|----|----|
|                                                     | -4                                                              | -3 | -2  | -1  | 0   | +1  | +2  | +3 | +4 | +5 |
| <i>Standard group (target &lt; 140 mm Hg)</i>       |                                                                 |    |     |     |     |     |     |    |    |    |
| 0 drug classes at baseline                          | 0                                                               | 0  | 5   | 74  | 224 | 111 | 19  | 3  | 0  | 1  |
| 1 drug class at baseline                            | 0                                                               | 0  | 26  | 287 | 673 | 301 | 43  | 4  | 0  | 0  |
| 2 drug classes at baseline                          | 0                                                               | 5  | 96  | 424 | 718 | 275 | 47  | 7  | 0  | 0  |
| 3 or more drug classes at baseline                  | 3                                                               | 27 | 133 | 392 | 414 | 179 | 24  | 2  | 0  | 0  |
| <i>Intensive group (target &lt; 120 mm Hg)</i>      |                                                                 |    |     |     |     |     |     |    |    |    |
| 0 drug classes at baseline                          | 0                                                               | 0  | 4   | 26  | 129 | 169 | 74  | 16 | 3  | 0  |
| 1 drug class at baseline                            | 0                                                               | 0  | 19  | 100 | 466 | 507 | 180 | 48 | 5  | 0  |
| 2 drug classes at baseline                          | 0                                                               | 5  | 30  | 168 | 652 | 537 | 191 | 36 | 5  | 1  |
| 3 or more drug classes at baseline                  | 4                                                               | 9  | 39  | 170 | 504 | 358 | 93  | 13 | 3  | 1  |

<sup>a</sup>Represents change between number of drug classes at the baseline visit and the final visit of the study at which there was also a blood pressure measurement. Numbers represent counts of patients in each cell.

**Table C. Instrument strength stratified by number of drug classes at baseline**

| Stratified instrumental variable analyses | F statistic | Partial R <sup>2</sup> |
|-------------------------------------------|-------------|------------------------|
| 0 drug classes at baseline                | 230         | 0.26                   |
| 1 drug class at baseline                  | 515         | 0.23                   |
| 2 drug classes at baseline                | 463         | 0.19                   |
| 3 or more drug classes at baseline        | 298         | 0.15                   |

**Table D. Baseline characteristics of the SPRINT study participants by SPRINT randomization status**

| Characteristics                                          | Standard (N= 4,523) | Intensive (N= 4,569) | P value |
|----------------------------------------------------------|---------------------|----------------------|---------|
| Age - years (SD)                                         | 67.8 (9.4)          | 67.9 (9.4)           | 0.8     |
| Female - no. (%)                                         | 1583 (35.0%)        | 1634 (35.8%)         | 0.5     |
| Black - no. (%) <sup>a</sup>                             | 1442 (31.9%)        | 1414 (30.9%)         | 0.3     |
| BMI - kg/m <sup>2</sup> (SD) <sup>b</sup>                | 29.8 (5.7)          | 29.9 (5.8)           | 0.4     |
| Fasting HDL - mg/dl (SD)                                 | 52.7 (14.6)         | 52.9 (14.4)          | 0.6     |
| Serum creatinine - mg/dl (SD)                            | 1.1 (0.3)           | 1.1 (0.3)            | 0.9     |
| Statin use - no. (%)                                     | 2018 (44.6%)        | 1952 (42.7%)         | 0.07    |
| Ever smoker - no. (%)                                    | 2530 (55.9%)        | 2566 (56.2%)         | 0.8     |
| History of cardiovascular disease - no. (%)              | 760 (16.8%)         | 764 (16.7%)          | 0.9     |
| History of chronic kidney disease - no. (%) <sup>c</sup> | 1267 (28.0%)        | 1305 (28.6%)         | 0.6     |
| Blood pressure - mm Hg (SD)                              |                     |                      |         |
| Systolic                                                 | 139.7 (15.4)        | 139.7 (15.8)         | 0.9     |
| Diastolic                                                | 78.1 (12.0)         | 78.2 (11.9)          | 0.6     |

SI conversions factor: To convert the values for cholesterol to millimoles per liter, multiply by 0.02586. To convert the values for glucose to millimoles per liter, multiply by 0.05551. HDL denotes high-density lipoprotein.

<sup>a</sup>Race was self-report. Black race includes Hispanic black and black.

<sup>b</sup>The body-mass index is the weight in kilograms divided by the square of the height in meters.

<sup>c</sup>No history of chronic kidney disease includes some participants with unknown chronic kidney disease status at baseline.



**Table E. Incremental effects of antihypertensive drugs on systolic blood pressure, major cardiovascular events, and serious adverse events at three-month visit and over the study period**

|                                                                                                                                                                                                                                                                                                                                                                                                                  | Systolic blood pressure, (mm Hg) | Major cardiovascular events (per thousand person-years) | Serious adverse events (per thousand person-years) |
|------------------------------------------------------------------------------------------------------------------------------------------------------------------------------------------------------------------------------------------------------------------------------------------------------------------------------------------------------------------------------------------------------------------|----------------------------------|---------------------------------------------------------|----------------------------------------------------|
| <b>Incremental effects on blood pressure (95% CI)</b>                                                                                                                                                                                                                                                                                                                                                            |                                  |                                                         |                                                    |
| <b>Models not adjusted for confounding</b>                                                                                                                                                                                                                                                                                                                                                                       |                                  |                                                         |                                                    |
| Number of drug classes at three-month visit <sup>a</sup>                                                                                                                                                                                                                                                                                                                                                         | -0.9 (-1.3, -0.6)                | 2.7 (0.4, 5.2)                                          | 17.4 (9, 26.1)                                     |
| Mean number of drug classes over study period <sup>b</sup>                                                                                                                                                                                                                                                                                                                                                       | -2.0 (-2.3, -1.6)                | 2.3 (0, 4.5)                                            | 13.7 (5.7, 22)                                     |
| <b>Instrumental variable models</b>                                                                                                                                                                                                                                                                                                                                                                              |                                  |                                                         |                                                    |
| Number of drug classes at three-month visit <sup>a</sup>                                                                                                                                                                                                                                                                                                                                                         | -15.1 (-16.5, -13.7)             | -9.1 (-16.2, -2.3)                                      | 18.3 (-6, 43.6)                                    |
| Mean number of drug classes over study period <sup>b</sup>                                                                                                                                                                                                                                                                                                                                                       | -16.4 (-17.5, -15.3)             | -7.1 (-12.8, -1.7)                                      | 14.2 (-5.4, 33.4)                                  |
| <sup>a</sup> Systolic blood pressure is measured at the three-month visit. Antihypertensive drug classes are measured at baseline and at the exit of the two-month visit.<br><sup>b</sup> Systolic blood pressure is measured at the final visit. We calculated the mean number of antihypertensive drug classes a patient was recorded as being prescribed over the study period.<br>CI is confidence interval. |                                  |                                                         |                                                    |

**Table F. Incremental effects of antihypertensive drugs on total number of blood pressure measurements**

|                                               | Incremental effect on no. of measurements (95% confidence interval) |
|-----------------------------------------------|---------------------------------------------------------------------|
| <b>Multivariable adjusted models</b>          |                                                                     |
| Final number of drug classes                  | 0.15 (0.07, 0.23)                                                   |
| Mean number of drug classes over study period | 0.17 (0.08, 0.26)                                                   |
| <b>Instrumental variable models</b>           |                                                                     |
| Final number of drug classes                  | 0.07 (-0.09, 0.22)                                                  |
| Mean number of drug classes over study period | 0.08 (-0.10, 0.25)                                                  |

**Table G. Nonparametric tests of constant additive effects on composite major cardiovascular events and serious adverse events**

| Variable                                       | P value <sup>a</sup>        |                        |
|------------------------------------------------|-----------------------------|------------------------|
|                                                | Major cardiovascular events | Serious adverse events |
| Antihypertensive drug                          | 0.3                         | 0.4                    |
| Age                                            | 0.7                         | 0.1                    |
| History of cardiovascular disease              | 0.9                         | 0.6                    |
| History of chronic kidney disease <sup>b</sup> | 0.1                         | 0.3                    |
| Creatinine                                     | 0.1                         | 0.4                    |
| Female                                         | 0.6                         | 0.4                    |
| Black <sup>c</sup>                             | 0.9                         | 0.4                    |
| BMI                                            | 0.4                         | 0.4                    |
| HDL                                            | 0.7                         | 0.3                    |
| Smoker                                         | 0.6                         | 0.1                    |
| Statin                                         | 0.2                         | 0.7                    |
| Intercept                                      | 0.8                         | 0.1                    |

<sup>a</sup>Kolmogorov-Smirnov test: null hypothesis is constant (time-invariant) additive effect.

<sup>b</sup>No history of chronic kidney disease includes some participants with unknown chronic kidney disease status at baseline.

<sup>c</sup>Race was self-report. Black race includes non-Hispanic and Hispanic black participants.

**Comparison with semi-parametric additive hazards models.** We estimated semi-parametric additive hazards models and confirmed that time-invariant parameters did not differ significantly from coefficients derived from weighted averages of time-variant, non-parametric models. In semi-parametric models, the incremental effect of antihypertensive drug classes was -7.7 events per 1,000 patient years for composite major cardiovascular events (95% CI, -16.2 to 0.8) and 10.2 events per 1,000 patient years for composite serious adverse events (95% CI, 0.8 to 20.0).

**Table H. Differences in incremental effects on blood pressure when adding first, second, third, or fourth or more antihypertensive drug class**

| Difference in incremental effects on blood pressure across baseline number of drug classes |                                                 |                |                                                 |                |                                                 |                |                                                 |                |                                |                                |
|--------------------------------------------------------------------------------------------|-------------------------------------------------|----------------|-------------------------------------------------|----------------|-------------------------------------------------|----------------|-------------------------------------------------|----------------|--------------------------------|--------------------------------|
|                                                                                            | 2 <sup>nd</sup> vs. 1 <sup>st</sup> added class |                | 3 <sup>rd</sup> vs. 2 <sup>nd</sup> added class |                | 4 <sup>th</sup> vs. 3 <sup>rd</sup> added class |                | 4 <sup>th</sup> vs. 1 <sup>st</sup> added class |                | Interaction model <sup>a</sup> |                                |
|                                                                                            | Difference (95% CI)                             | <i>P</i> value | Interaction term               | <i>P</i> value for interaction |
| <b>Standard adjusted models</b>                                                            |                                                 |                |                                                 |                |                                                 |                |                                                 |                |                                |                                |
| Systolic                                                                                   | 0.5 (-0.5, 1.4)                                 | 0.3            | 0.3 (-0.4, 1.0)                                 | 0.5            | 0.9 (0.1, 1.6)                                  | 0.03           | 1.6 (0.6, 2.6)                                  | 0.002          | 0.6                            | <0.001                         |
| Diastolic                                                                                  | 0.3 (-0.5, 1.0)                                 | 0.5            | 0.0 (-0.4, 0.5)                                 | 0.9            | 0.4 (-0.1, 0.9)                                 | 0.1            | 0.7 (-0.1, 1.4)                                 | 0.07           | 0.2                            | 0.03                           |
| <b>Instrumental variable models</b>                                                        |                                                 |                |                                                 |                |                                                 |                |                                                 |                |                                |                                |
| Systolic                                                                                   | -0.3 (-2.2, 1.5)                                | 0.7            | -0.5 (-1.9, 0.9)                                | 0.5            | -0.4 (-2.0, 1.3)                                | 0.7            | -1.2 (-3.3, 0.8)                                | 0.2            | -- <sup>b</sup>                | -- <sup>b</sup>                |
| Diastolic                                                                                  | 0.3 (-1.2, 1.7)                                 | 0.7            | -0.7 (-1.7, 0.4)                                | 0.2            | 0.2 (-1.0, 1.4)                                 | 0.8            | -0.2 (-1.8, 1.3)                                | 0.8            | -- <sup>b</sup>                | -- <sup>b</sup>                |

<sup>a</sup>We interacted the final number of antihypertensive drug classes with the number of drug classes at baseline to formally test whether the incremental effects of antihypertensive drugs varied systematically across baseline number of drug classes.

<sup>b</sup>We did not estimate interaction instrumental variable models because interacting the instrument (randomization status) with a potential confounder (the number of drug classes at baseline) would render the instrumental variable analysis invalid.

CI is confidence interval.

**Table I. Incremental effects on systolic blood pressure across clinical and demographic subgroups**

| Subgroup                                             | Adding 1 <sup>st</sup> drug class |         | Adding 2 <sup>nd</sup> drug class |         | Adding 3 <sup>rd</sup> drug class |         | Adding 4 <sup>th</sup> or more drug class |         |
|------------------------------------------------------|-----------------------------------|---------|-----------------------------------|---------|-----------------------------------|---------|-------------------------------------------|---------|
|                                                      | Incremental effect (95% CI)       | P value | Incremental effect (95% CI)       | P value | Incremental effect (95% CI)       | P value | Incremental effect (95% CI)               | P value |
| <b>Age</b>                                           |                                   |         |                                   |         |                                   |         |                                           |         |
| < 75 years                                           | -14.8 (-17.3, -12.4)              | <0.001  | -14.6 (-16.6, -12.7)              | <0.001  | -15.1 (-16.9, -13.2)              | <0.001  | -14.8 (-17.5, -12.1)                      | <0.001  |
| ≥ 75 years                                           | -9.3 (-15.8, -2.8)                | 0.005   | -13.1 (-16.1, -10.2)              | <0.001  | -14.1 (-17.3, -10.9)              | <0.001  | -16.1 (-21.0, -11.1)                      | <0.001  |
| Difference                                           | 5.5 (0.7, 10.3)                   | 0.02    | 1.5 (-1.0, 4.1)                   | 0.2     | 1.0 (-1.5, 3.5)                   | 0.4     | -1.3 (-4.6, 1.9)                          | 0.4     |
| <b>Sex</b>                                           |                                   |         |                                   |         |                                   |         |                                           |         |
| Male                                                 | -12.7 (-15.2, -10.3)              | <0.001  | -13.0 (-14.4, -11.5)              | <0.001  | -14.6 (-16.5, -12.8)              | <0.001  | -14.6 (-17.2, -12.1)                      | <0.001  |
| Female                                               | -18.8 (-26.8, -10.8)              | <0.001  | -16.7 (-20.5, -13.0)              | <0.001  | -14.8 (-17.6, -12.0)              | <0.001  | -15.6 (-19.7, -11.6)                      | <0.001  |
| Difference                                           | -6.1 (-10.9, -1.3)                | 0.01    | -3.8 (-6.0, -1.5)                 | 0.001   | -0.2 (-2.4, 2.1)                  | 0.9     | -1.0 (-4.0, 2.0)                          | 0.5     |
| <b>Race<sup>a</sup></b>                              |                                   |         |                                   |         |                                   |         |                                           |         |
| Non-black                                            | -14.6 (-17.6, -11.6)              | <0.001  | -13.6 (-15.2, -11.9)              | <0.001  | -14.7 (-16.8, -12.6)              | <0.001  | -16.4 (-19.5, -13.3)                      | <0.001  |
| Black                                                | -11.5 (-15.3, -7.6)               | <0.001  | -16.1 (-20.1, -12.1)              | <0.001  | -14.6 (-17.3, -11.9)              | <0.001  | -13.1 (-16.5, -9.8)                       | <0.001  |
| Difference                                           | 3.1 (-0.2, 6.5)                   | 0.06    | -2.5 (-4.8, -0.2)                 | 0.04    | 0.1 (-2.1, 2.3)                   | 0.9     | 3.3 (0.6, 6.0)                            | 0.02    |
| <b>Obesity<sup>b</sup></b>                           |                                   |         |                                   |         |                                   |         |                                           |         |
| Non-obese                                            | -13.5 (-16.0, -11.1)              | <0.001  | -14.4 (-16.2, -12.6)              | <0.001  | -15.3 (-17.2, -13.4)              | <0.001  | -14.5 (-17.1, -11.9)                      | <0.001  |
| Obese                                                | -16.0 (-24.1, -7.8)               | <0.001  | -11.8 (-16.4, -7.3)               | <0.001  | -12.2 (-15.2, -9.2)               | <0.001  | -17.2 (-22.4, -12.1)                      | <0.001  |
| Difference                                           | -2.4 (-6.7, 1.9)                  | 0.3     | 2.6 (-0.5, 5.6)                   | 0.1     | 3.1 (0.5, 5.7)                    | 0.02    | -2.7 (-5.9, 0.5)                          | 0.1     |
| <b>Smoking</b>                                       |                                   |         |                                   |         |                                   |         |                                           |         |
| Never-smoker                                         | -11.8 (-15.2, -8.3)               | <0.001  | -14.2 (-16.7, -11.8)              | <0.001  | -15.9 (-18.7, -13.0)              | <0.001  | -14.4 (-17.3, -11.4)                      | <0.001  |
| Ever-smoker                                          | -15.4 (-18.5, -12.4)              | <0.001  | -14.2 (-16.2, -12.1)              | <0.001  | -14.0 (-15.8, -12.1)              | <0.001  | -15.5 (-18.7, -12.4)                      | <0.001  |
| Difference                                           | -3.7 (-6.8, -0.5)                 | 0.02    | 0.0 (-1.9, 2.0)                   | 0.96    | 1.9 (-0.2, 4.0)                   | 0.08    | -1.2 (-3.8, 1.5)                          | 0.4     |
| <b>History of cardiovascular disease</b>             |                                   |         |                                   |         |                                   |         |                                           |         |
| No                                                   | -13.9 (-16.3, -11.5)              | <0.001  | -14.6 (-16.5, -12.6)              | <0.001  | -14.9 (-16.7, -13.1)              | <0.001  | -15.2 (-17.7, -12.6)                      | <0.001  |
| Yes                                                  | -13.0 (-19.0, -6.9)               | <0.001  | -12.3 (-16.3, -8.3)               | <0.001  | -13.7 (-17.6, -9.9)               | <0.001  | -14.8 (-19.9, -9.6)                       | <0.001  |
| Difference                                           | 0.9 (-3.5, 5.4)                   | 0.7     | 2.2 (-0.7, 5.1)                   | 0.1     | 1.2 (-1.4, 3.7)                   | 0.4     | 0.4 (-3.4, 4.2)                           | 0.8     |
| <b>History of chronic kidney disease<sup>c</sup></b> |                                   |         |                                   |         |                                   |         |                                           |         |
| No                                                   | -13.8 (-15.8, -11.8)              | <0.001  | -14.8 (-16.8, -12.8)              | <0.001  | -15.0 (-16.8, -13.2)              | <0.001  | -14.7 (-17.6, -11.8)                      | <0.001  |
| Yes                                                  | -18.3 (-33.3, -3.3)               | 0.02    | -12.5 (-15.6, -9.4)               | <0.001  | -14.3 (-17.5, -11.1)              | <0.001  | -15.9 (-19.4, -12.3)                      | <0.001  |
| Difference                                           | -4.5 (-13.1, 4.1)                 | 0.3     | 2.3 (-0.1, 4.8)                   | 0.06    | 0.7 (-1.6, 3.1)                   | 0.6     | -1.2 (-4.2, 1.8)                          | 0.4     |

<sup>a</sup>Race was self-report. Black race includes non-Hispanic and Hispanic black participants.

<sup>b</sup>Obesity is defined as a body-mass index greater than or equal to 35.

<sup>c</sup>No history of chronic kidney disease includes some participants with unknown chronic kidney disease status at baseline.

CI is confidence interval.

**Table J. Reduced-form analyses of the effect of randomization status on changes in prescribed number of drug classes and systolic blood pressure**

|                                                                      | <b>Change in number of antihypertensive drug classes</b> | <b>Change in systolic blood pressure (mm Hg)</b> |
|----------------------------------------------------------------------|----------------------------------------------------------|--------------------------------------------------|
| <b>Overall effect of randomization status</b>                        | 1.0 (0.9, 1.0)                                           | -14.1 (-14.8, -13.4)                             |
| <b>Effect by number of antihypertensive drug classes at baseline</b> |                                                          |                                                  |
| 0 drug classes at baseline                                           | 1.1 (1.0, 1.2)                                           | -15.3 (-17.1, -13.6)                             |
| 1 drug class at baseline                                             | 1.0 (0.9, 1.1)                                           | -14.3 (-15.4, -13.2)                             |
| 2 drug classes at baseline                                           | 0.9 (0.9, 1.0)                                           | -14.0 (-15.1, -12.9)                             |
| 3 or more drug classes at baseline                                   | 0.9 (0.8, 1.0)                                           | -13.6 (-14.9, -12.3)                             |

## Online Appendix References

1. Forouzanfar MH, Liu P, Roth GA, et al. Global Burden of Hypertension and Systolic Blood Pressure of at Least 110 to 115 mm Hg, 1990-2015. *JAMA*. 2017;317(2):827-838. doi:10.1001/JAMA.2016.19043.
2. Gu Q, Burt VL, Dillon CF, Yoon S. Trends in antihypertensive medication use and blood pressure control among United States adults with hypertension: the National Health And Nutrition Examination Survey, 2001 to 2010. *Circulation*. 2012;126(17):2105-2114. <http://circ.ahajournals.org/cgi/doi/10.1161/CIRCULATIONAHA.112.096156>.
3. Rana BK, Dhamija A, Panizzon MS, et al. Imputing observed blood pressure for antihypertensive treatment: impact on population and genetic analyses. *Am J Hypertens*. 2014;27(6):828-837. doi:10.1093/ajh/hpt271.
4. Timbie JW, Hayward RA, Vijan S. Variation in the net benefit of aggressive cardiovascular risk factor control across the US population of patients with diabetes mellitus. *Arch Intern Med*. 2010;170(12):1037-1044. doi:10.1001/archinternmed.2010.150.
5. Timbie JW, Hayward RA, Vijan S. Diminishing efficacy of combination therapy, response-heterogeneity, and treatment intolerance limit the attainability of tight risk factor control in patients with diabetes. *Heal Serv Res*. 2010;45(2):437-456. doi:10.1111/j.1475-6773.2009.01075.x.
6. Mold JW, Hamm RM, McCarthy LH. The Law of Diminishing Returns in Clinical Medicine: How Much Risk Reduction is Enough? *J Am Board Fam Med*. 2010;23(3):371-375. <http://www.jabfm.org/cgi/doi/10.3122/jabfm.2010.03.090178>.
7. Maher RL, Hanlon J, Hajjar ER. Clinical consequences of polypharmacy in elderly. *Expert Opin Drug Saf*. 2013;13(1):57-65. doi:10.1517/14740338.2013.827660.
8. Mukete BN, Ferdinand KC. Polypharmacy in Older Adults With Hypertension: A Comprehensive Review. *J Clin Hypertens*. 2015;18(1):10-18. <http://doi.wiley.com/10.1111/jch.12624>.
9. Calhoun DA, Lacourciere Y, Chiang YT, Glazer RD. Triple antihypertensive therapy with amlodipine, valsartan, and hydrochlorothiazide: a randomized clinical trial. *Hypertension*. 2009;54(1):32-39. doi:10.1161/HYPERTENSIONAHA.109.131300.
10. James PA, Oparil S, Carter BL, et al. 2014 Evidence-Based Guideline for the Management of High Blood Pressure in Adults. *JAMA*. 2014;311(5):507-514. <http://jama.jamanetwork.com/article.aspx?doi=10.1001/jama.2013.284427>.
11. Hypertension EETF for the M of A, Mancia G, Fagard R, et al. 2013 Practice guidelines for the management of arterial hypertension of the European Society of Hypertension (ESH) and the European Society of Cardiology (ESC): ESH/ESC Task Force for the Management of Arterial Hypertension. *J Hypertens*. 2013;31(10):1925-1938. doi:10.1097/HJH.0b013e328364ca4c.
12. Calhoun DA, Jones D, Textor S, et al. Resistant hypertension: diagnosis, evaluation, and treatment: a scientific statement from the American Heart Association Professional Education Committee of the Council for High Blood Pressure Research. *Circulation*. 2008;117(25):e510-26. doi:10.1161/CIRCULATIONAHA.108.189141.
13. Flack JM, Sica DA, Bakris G, et al. Management of high blood pressure in Blacks: an update of the International Society on Hypertension in Blacks consensus statement. *Hypertension*. 2010;56(5):780-800. doi:10.1161/HYPERTENSIONAHA.110.152892.
14. Gradman AH, Basile JN, Carter BL, Bakris GL, Group on behalf of the AS of HW. Combination Therapy in Hypertension. *J Clin Hypertens*. 2010;13(3):146-154. <http://doi.wiley.com/10.1111/j.1751-7176.2010.00397.x>.
15. Law MR, Wald NJ, Morris JK, Jordan RE. Value of low dose combination treatment with blood pressure lowering drugs: analysis of 354 randomised trials. *BMJ*. 2003;326(7404):1427. doi:10.1136/bmj.326.7404.1427.

16. Egan BM, Li J, Shatat IF, Fuller JM, Sinopoli A. Closing the Gap in Hypertension Control Between Younger and Older Adults: National Health and Nutrition Examination Survey (NHANES) 1988 to 2010. *Circulation*. 2014;129(20):2052-2061. <http://circ.ahajournals.org/cgi/doi/10.1161/CIRCULATIONAHA.113.007699>.
17. Murphy CM, Kearney PM, Shelley EB, Fahey T, Dooley C, Kenny RA. Hypertension prevalence, awareness, treatment and control in the over 50s in Ireland: evidence from The Irish Longitudinal Study on Ageing. *J Public Heal*. 2016;38(3):450-458. doi:10.1093/pubmed/fdv057.
18. Cruickshank J, Thorp J, Zacharias FJ. Benefits and potential harm of lowering high blood pressure. *Lancet*. 1987;329:581-584.
19. Zanchetti A. Blood pressure targets of antihypertensive treatment: up and down the J-shaped curve. *Eur Hear J*. 2010;31(23):2837-2840. doi:10.1093/eurheartj/ehq281.
20. Wald DS, Law M, Morris JK, Bestwick JP, Wald NJ. Combination Therapy Versus Monotherapy in Reducing Blood Pressure: Meta-analysis on 11,000 Participants from 42 Trials. *AJM*. 2009;122:290-300.
21. Wu J, Kraja AT, Oberman A, et al. A summary of the effects of antihypertensive medications on measured blood pressure. *Am J Hypertens*. 2005;18(7):935-942. <http://ajh.oxfordjournals.org/cgi/doi/10.1016/j.amjhyper.2005.01.011>.
22. Group SR, Wright JT, Williamson JD, et al. A Randomized Trial of Intensive versus Standard Blood-Pressure Control. *N Engl J Med*. 2015;373(22):2103-2116. <http://eutils.ncbi.nlm.nih.gov/entrez/eutils/elink.fcgi?dbfrom=pubmed&id=26551272&retmode=ref&cmd=prlinks>.
23. Touyz RM, Dominiczak AF. Successes of SPRINT, but Still Some Hurdles to Cross. *Hypertension*. 2016;67(2):268-269. doi:10.1161/HYPERTENSIONAHA.115.06725.
24. Cushman WC, Whelton PK, Fine LJ, et al. SPRINT Trial Results: Latest News in Hypertension Management. *Hypertension*. 2016;67(2):263-265. doi:10.1161/HYPERTENSIONAHA.115.06722.
25. Coady SA, Mensah GA, Wagner EL, Goldfarb ME, Hitchcock DM, Giffen CA. Use of the National Heart, Lung, and Blood Institute Data Repository. *N Engl J Med*. 2017;376(19):1849-1858. doi:10.1056/NEJMsa1603542.
26. Burns NS, Miller PW. Learning What We Didn't Know — The SPRINT Data Analysis Challenge. *N Engl J Med*. 2017;363(1):1-3. doi:10.1056/NEJMp1002530.
27. New England Journal of Medicine. The SPRINT Data Analysis Challenge. <https://challenge.nejm.org/pages/home>. Published 2017.
28. Markovitz A. Source code for “The incremental effects of antihypertensive drugs: an instrumental variable analysis.” 2017. doi:10.5281/zenodo.1042177.
29. Aalen OO. A linear regression model for the analysis of life times. *Stat Med*. 1989;8(8):907-925. <http://doi.wiley.com/10.1002/sim.4780080803>.
30. Tchetgen Tchetgen EJ, Walter S, Vansteelandt S, Martinussen T, Glymour M. Instrumental Variable Estimation in a Survival Context. *Epidemiology*. 2015;26(3):402-410. <http://content.wkhealth.com/linkback/openurl?sid=WKPTLP:landingpage&an=00001648-201505000-00016>.
31. Therneau TM. A package for Survival Analysis in R. 2015.
32. Baum CF, Schaffer ME, Stillman S. Instrumental variables and GMM: Estimation and testing. *Stata J*. 2003;3(1):1-31. doi:The Stata Journal.
33. Staiger D, Stock J. Instrumental Variables Regression with Weak Instruments. *Natl Bur Econ Res*. 1997;65(3):557-586.
34. Moran AE, Odden MC, Thanataveerat A, et al. Cost-Effectiveness of Hypertension Therapy According to 2014 Guidelines. *N Engl J Med*. 2015;372:447-455.
35. G.Y. L, Beevers M, Beevers DG. The “Birmingham Hypertension Square” for the optimum

- choice of add-in drugs in the management of resistant hypertension. *J Hum Hypertens*. 1998;12(11):761-763.
36. Ferdinand KC, Weitzman R, Israel M, Lee J, Purkayastha D, Jaimes EA. Efficacy and safety of aliskiren-based dual and triple combination therapies in US minority patients with stage 2 hypertension. *J Am Soc Hypertens*. 2011;5(2):102-113.  
<http://linkinghub.elsevier.com/retrieve/pii/S1933171111000076>.
  37. Gradman AH. Rationale for triple-combination therapy for management of high blood pressure. *J Clin Hypertens*. 2010;12(11):869-878. doi:10.1111/j.1751-7176.2010.00360.x.
  38. Oparil S, Melino M, Lee J, Fernandez V, Heyrman R. Triple therapy with olmesartan medoxomil, amlodipine besylate, and hydrochlorothiazide in adult patients with hypertension: The TRINITY multicenter, randomized, double-blind, 12-week, parallel-group study. *Clin Ther*. 2010;32:1252-1269.
  39. Aronow WS, Harrington RA, Fleg JL, et al. ACCF/AHA 2011 Expert Consensus Document on Hypertension in the Elderly. *Circulation*. 2011;123:2434-2506.
  40. Flack JM, Sica DA, Bakris G, et al. Management of high blood pressure in Blacks: an update of the International Society on Hypertension in Blacks consensus statement. *Hypertension*. 2010;56(5):780-800. doi:10.1161/HYPERTENSIONAHA.110.152892.
  41. Williamson JD, Supiano MA, Applegate WB, et al. Intensive vs Standard Blood Pressure Control and Cardiovascular Disease Outcomes in Adults Aged  $\geq 75$  Years. *JAMA*. 2016;315(24):2610-2673.  
<http://jama.jamanetwork.com/article.aspx?doi=10.1001/jama.2016.7050>.
  42. Bromfield SG, Bowling CB, Tanner RM, et al. Trends in hypertension prevalence, awareness, treatment, and control among US adults 80 years and older, 1988-2010. *J Clin Hypertens*. 2014;16(4):270-276. doi:10.1111/jch.12281.
  43. Beddhu S, Rocco M V, Toto R, et al. Effects of Intensive Systolic Blood Pressure Control on Kidney and Cardiovascular Outcomes in Persons Without Kidney Disease: A Secondary Analysis of a Randomized Trial. *Ann Intern Med*. 2017. doi:10.7326/M16-2966.
  44. Clarke KA. The Phantom Menace: Omitted Variable Bias in Econometric Research. *Confl Manag Peace Sci*. 2005;22(4):341-352. doi:10.1080/07388940500339183.
  45. Bress AP, Tanner RM, Hess R, Colantonio LD, Shimbo D, Muntner P. Generalizability of SPRINT Results to the U.S. Adult Population. *J Am Coll Cardiol*. 2016;67(5):463-472. doi:10.1016/j.jacc.2015.10.037.
  46. Navar AM, Pencina MJ, Peterson ED. Assessing Cardiovascular Risk to Guide Hypertension Diagnosis and Treatment. *JAMA Cardiol*. 2016;27705(8):864-871. doi:10.1001/jamacardio.2016.2861.
  47. Nallamothu BK, Hayward RA, Bates ER. Beyond the randomized clinical trial: the role of effectiveness studies in evaluating cardiovascular therapies. *Circulation*. 2008;118(12):1294-1303. doi:10.1161/CIRCULATIONAHA.107.703579.
  48. Gaziano TA, Bitton A, Anand S, Weinstein MC. The global cost of nonoptimal blood pressure. *J Hypertens*. 2009;27(7):1472-1477. doi:10.1097/HJH.0b013e32832a9ba3.
